# Supplementary material for: Copper(i) iodide–DMAP catalyzed homo- and heterocoupling of terminal alkynes
Source: Royal Society of Chemistry journal article supplement (doi:10.1039/c3ra23478a), 2013-01-01

# Copper (I) Iodide-DMAP catalyzed Homo- and Heterocoupling of Terminal Alkynes

**Balu S. Navale and Ramakrishna G. Bhat\***

[rgb@iiserpune.ac.in](mailto:rgb@iiserpune.ac.in)

*Mendeleev Block, Department of Chemistry, Indian Institute of Science Education and Research (IISER),  
Pune, Maharashtra, 411008, India*

**(A)  $^1\text{H}$  and  $^{13}\text{C}$  NMR spectra, .....S2-S37**

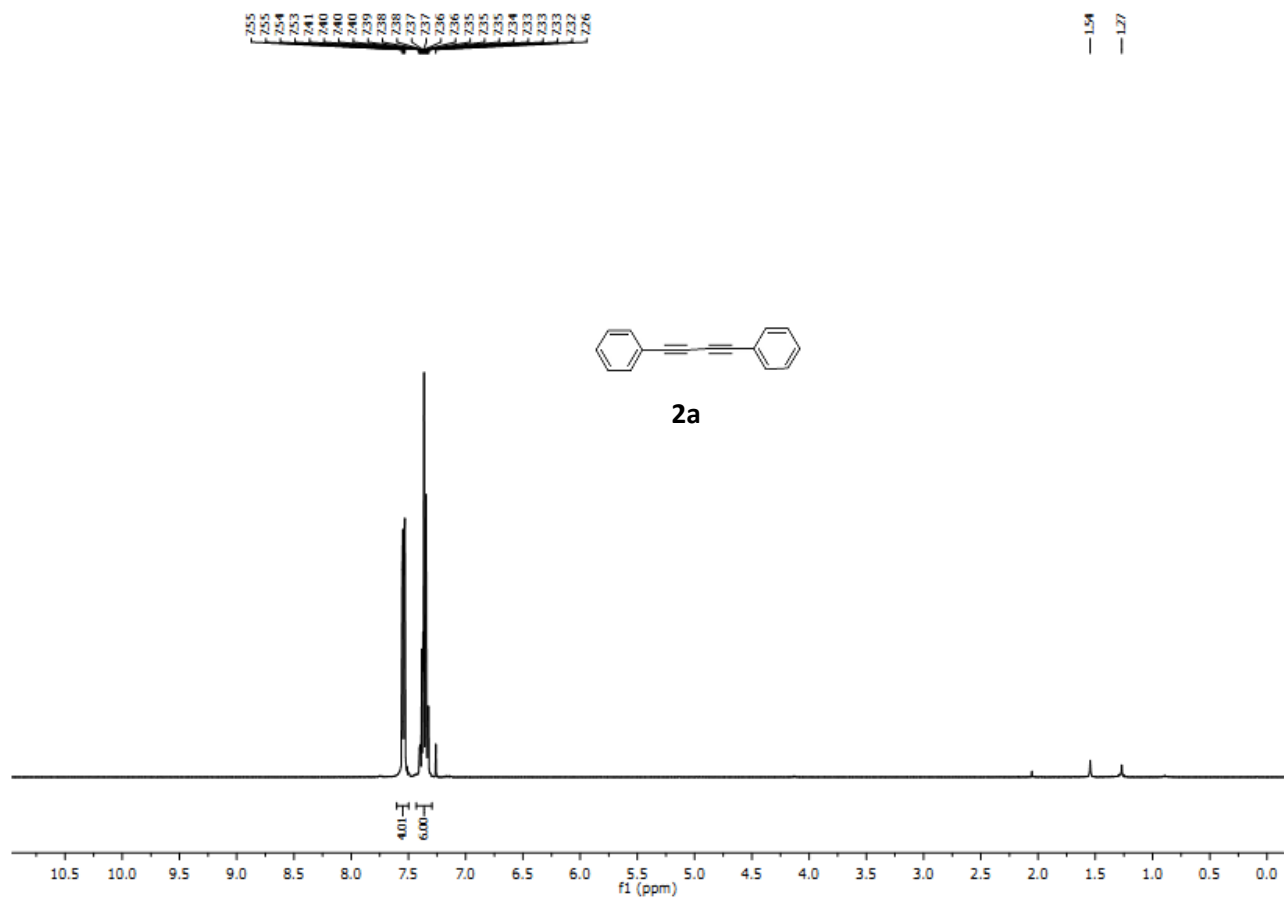

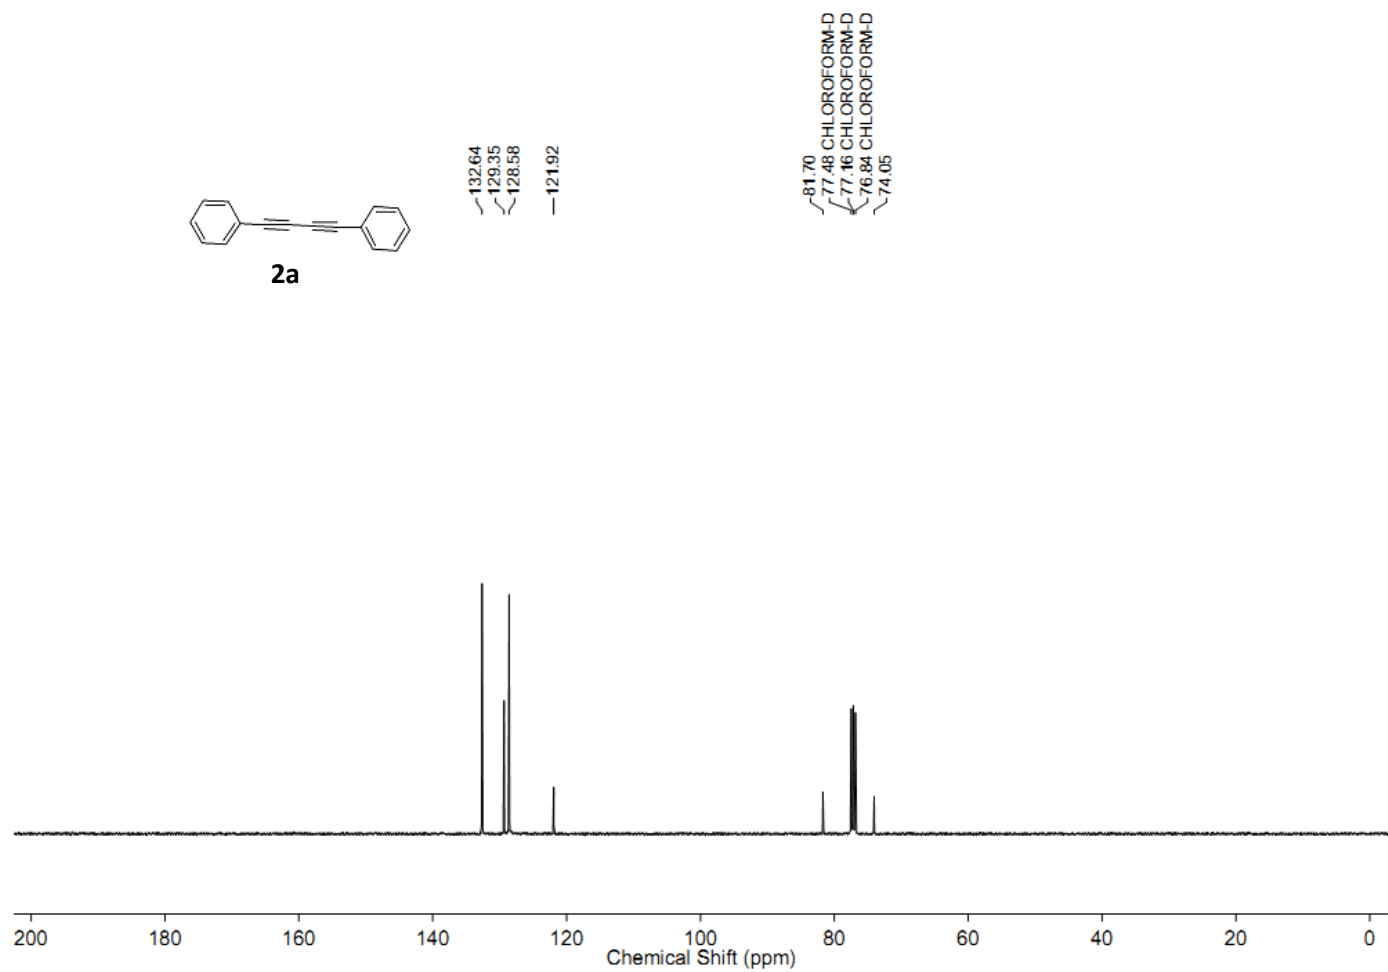

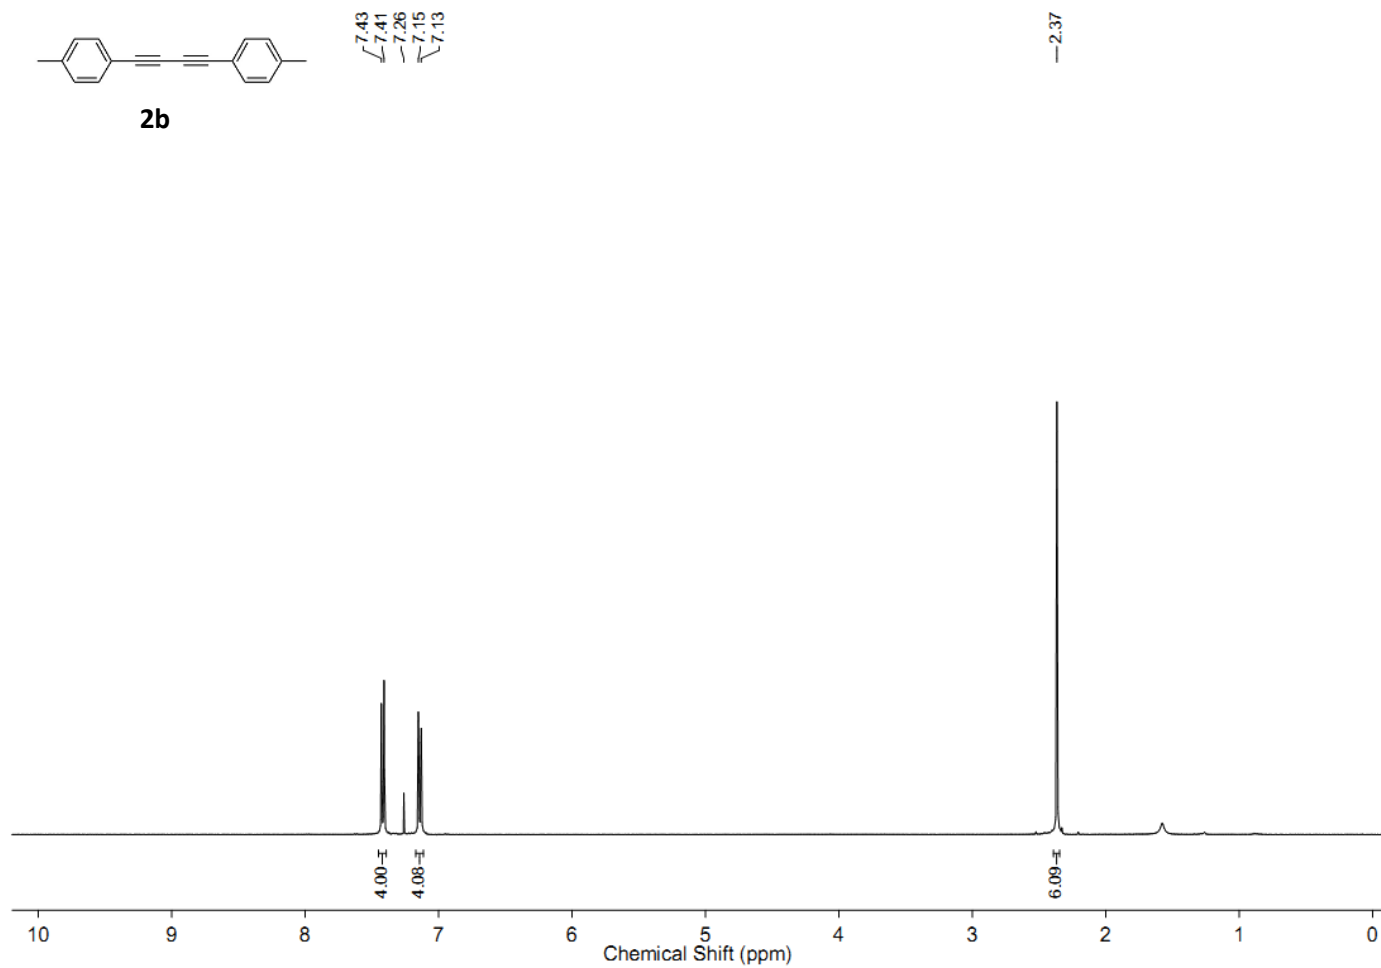

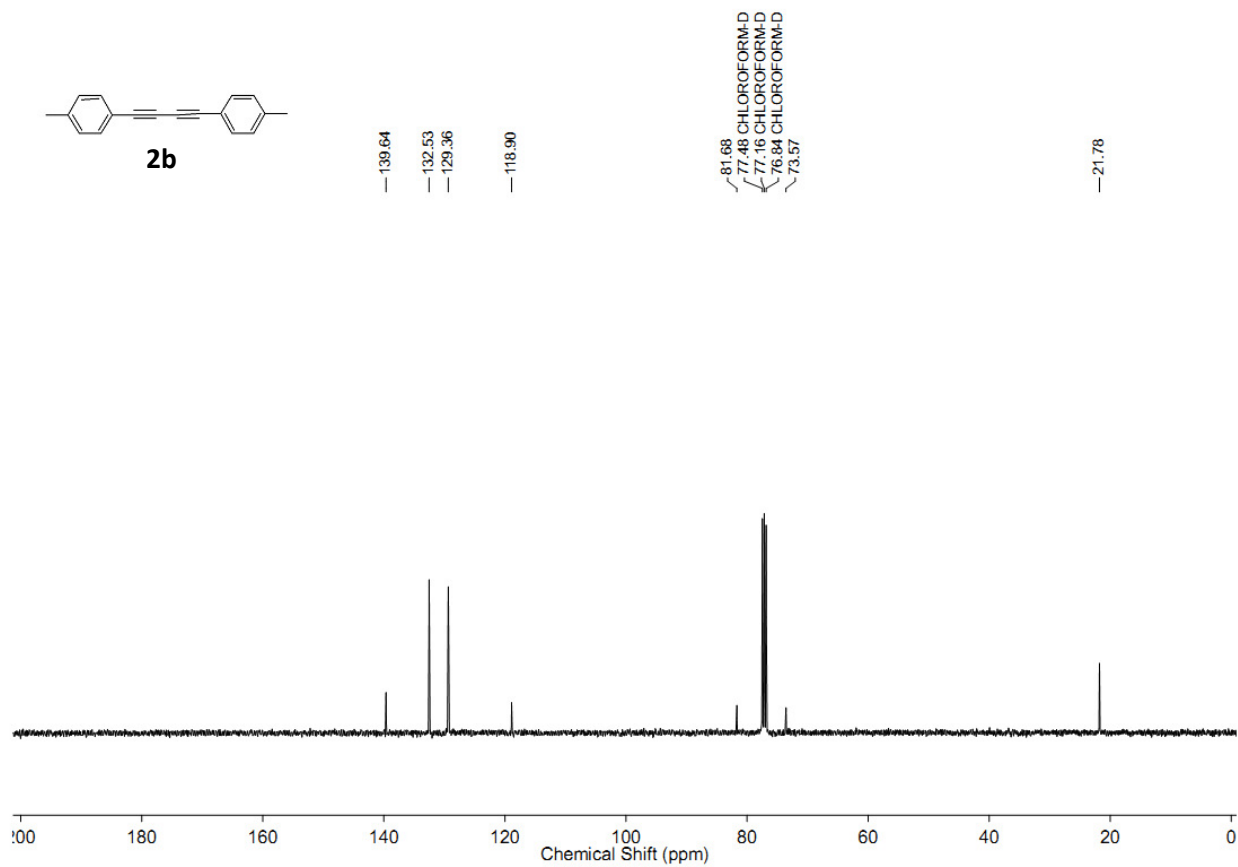

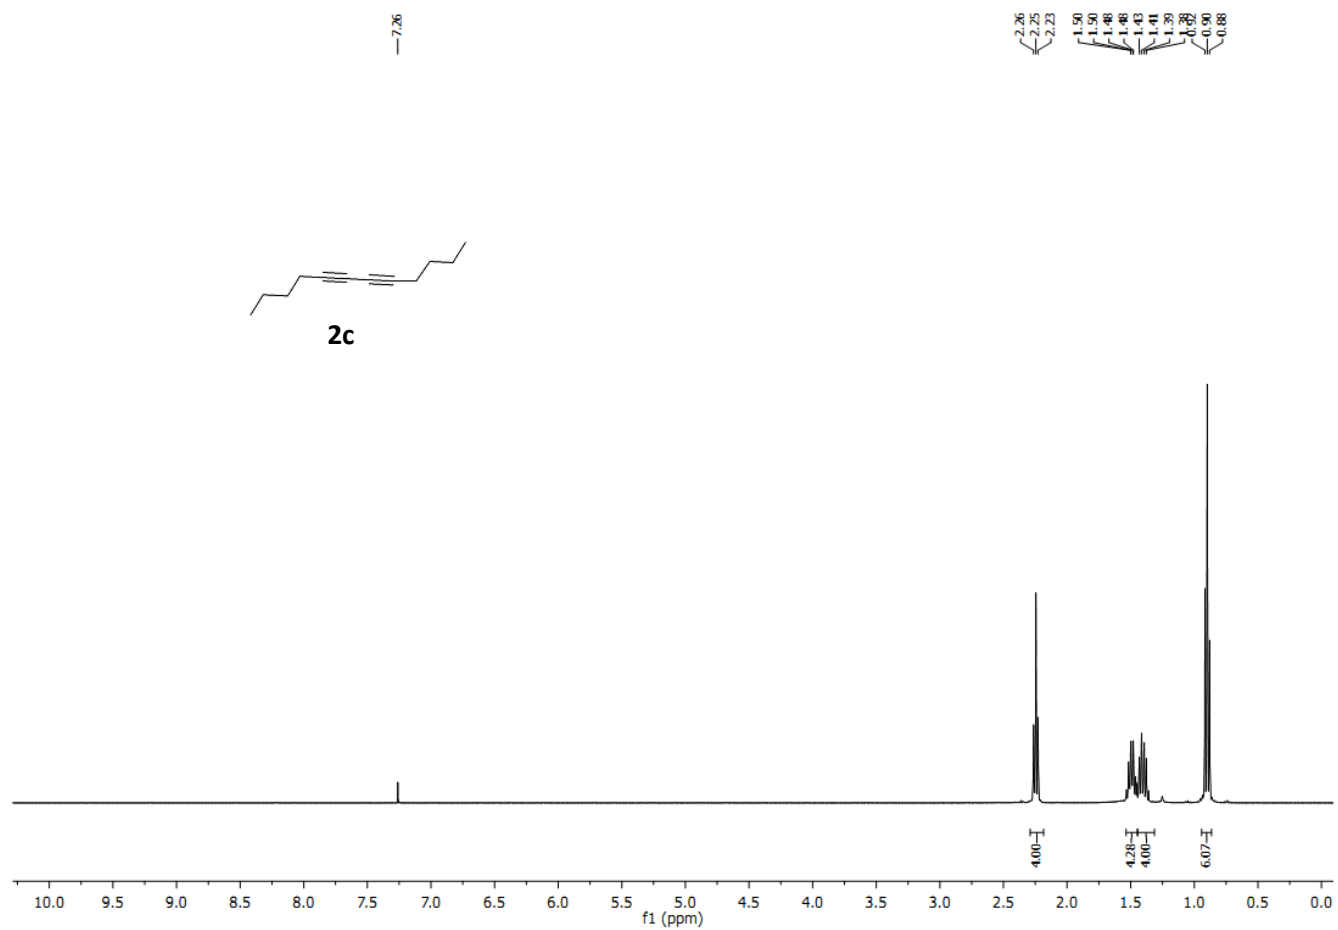

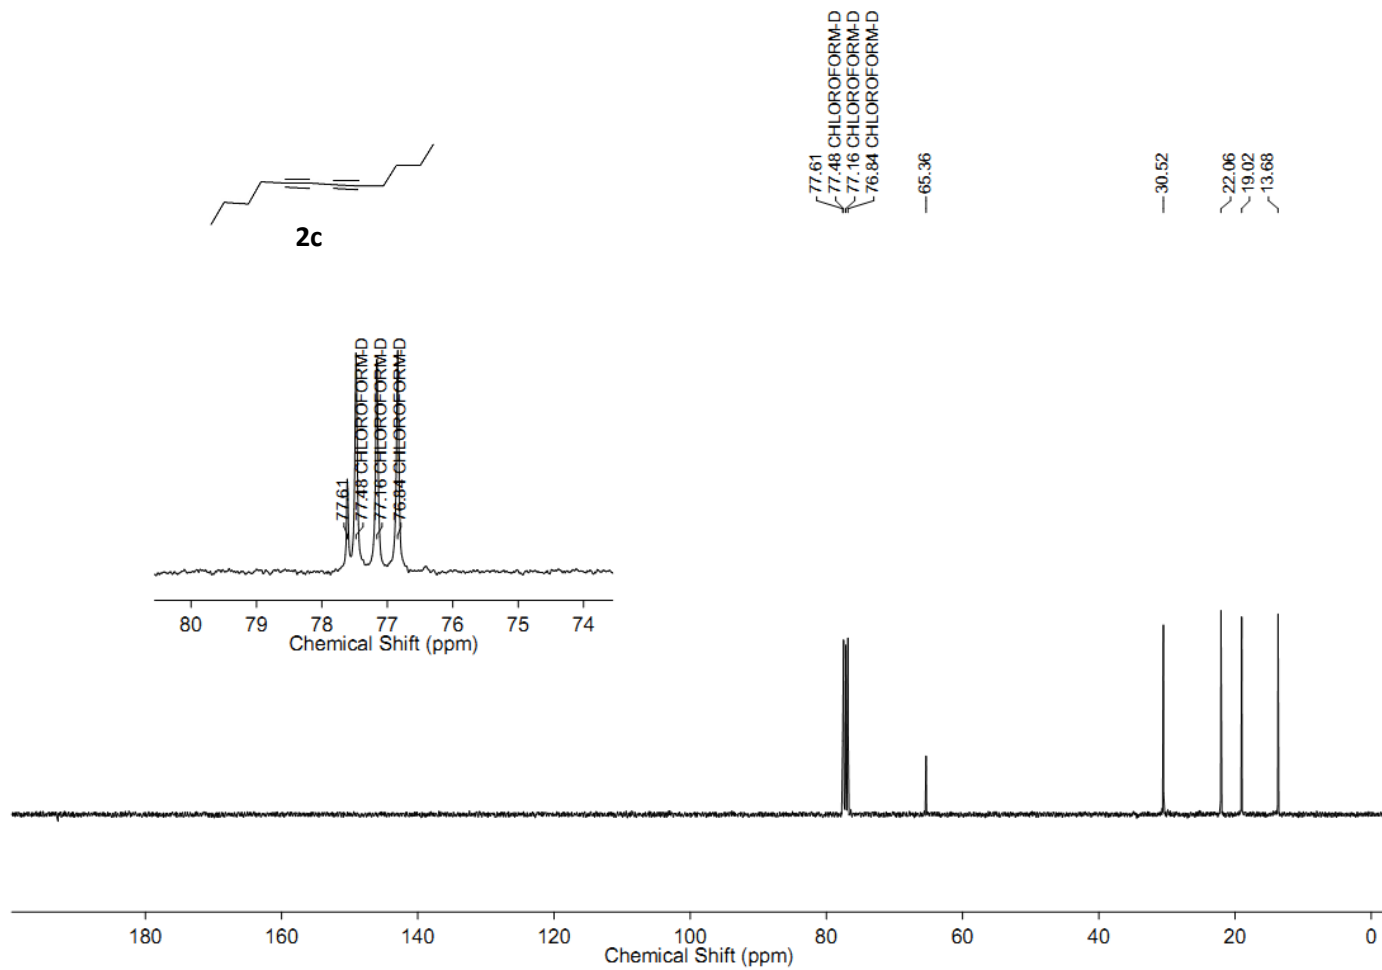

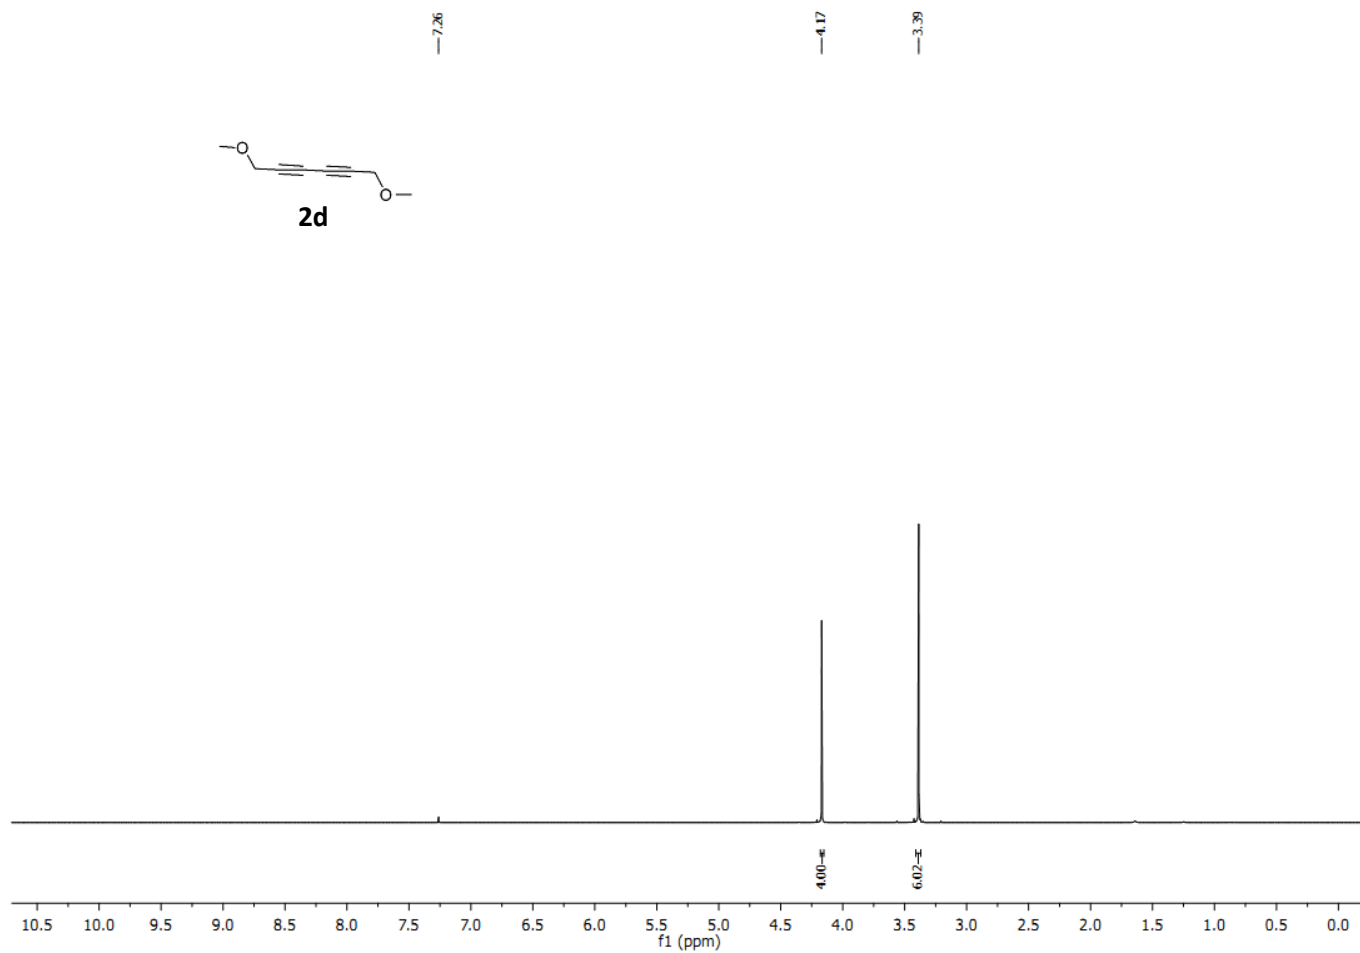



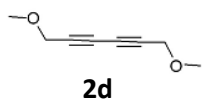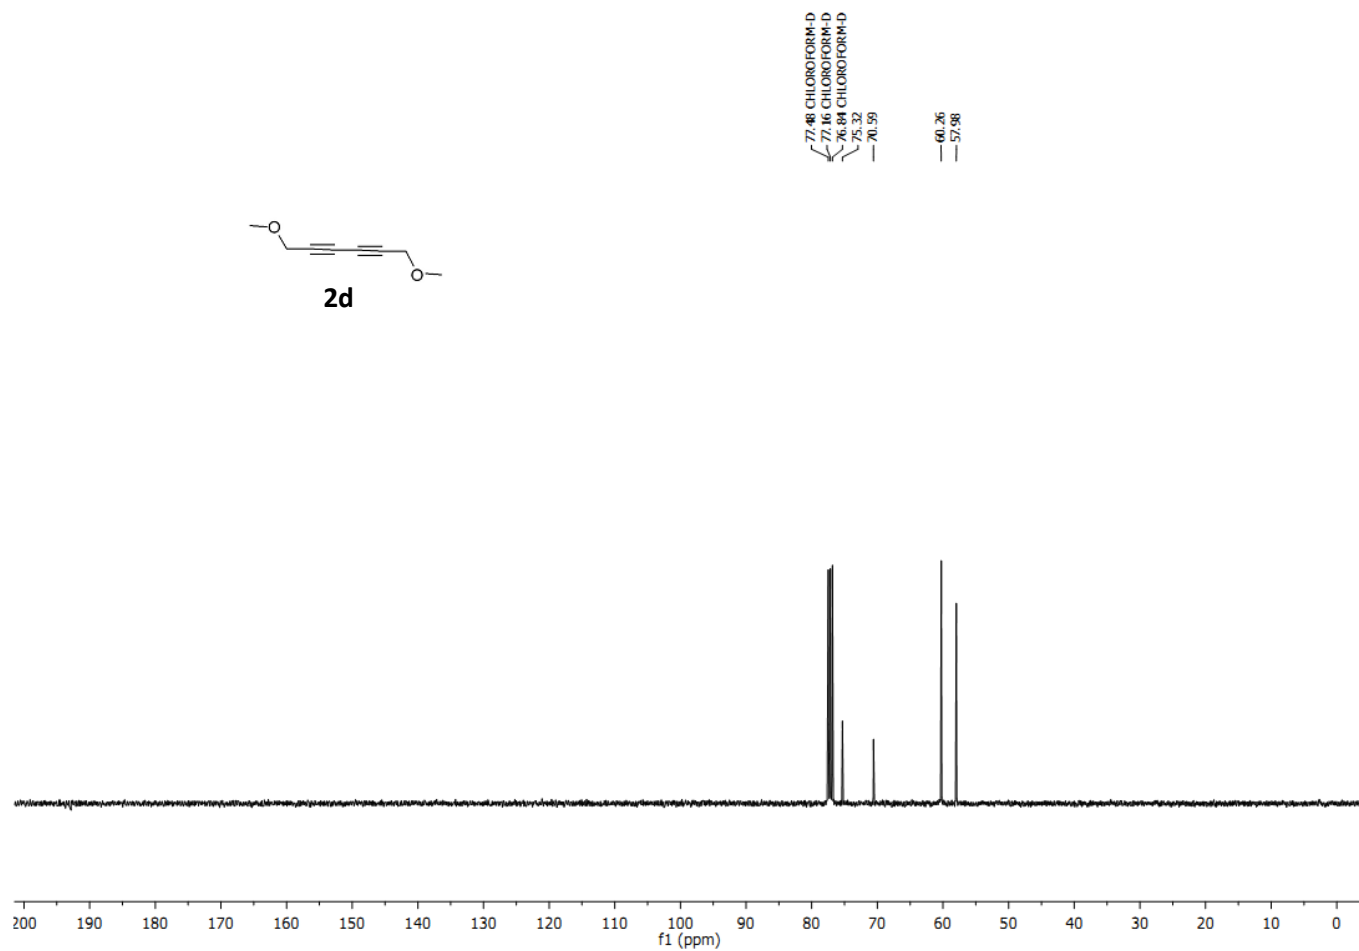

180712-08-BSN-103-1

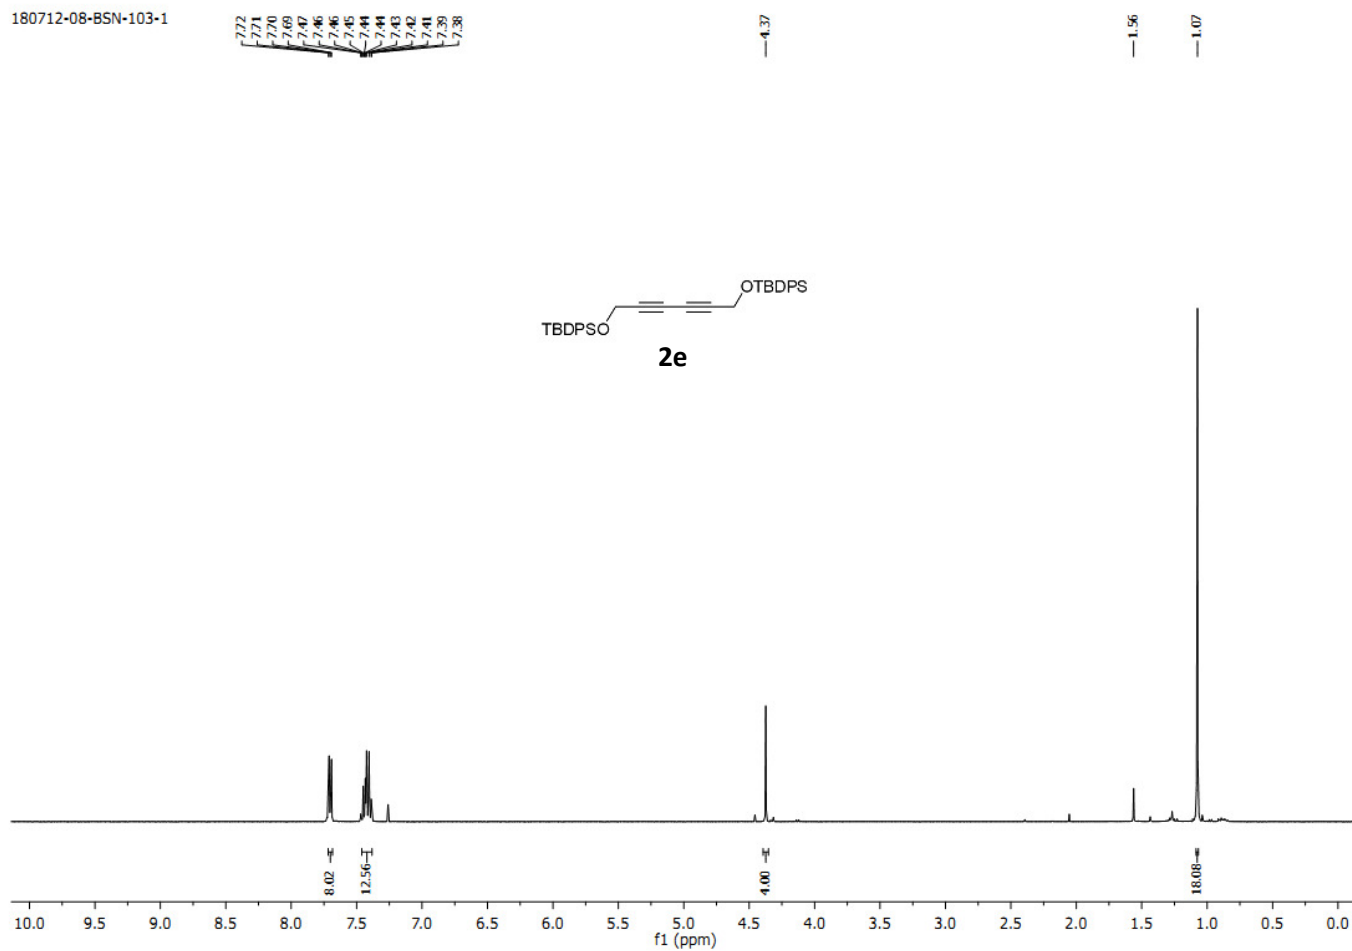



300712-24-BSN-104-2

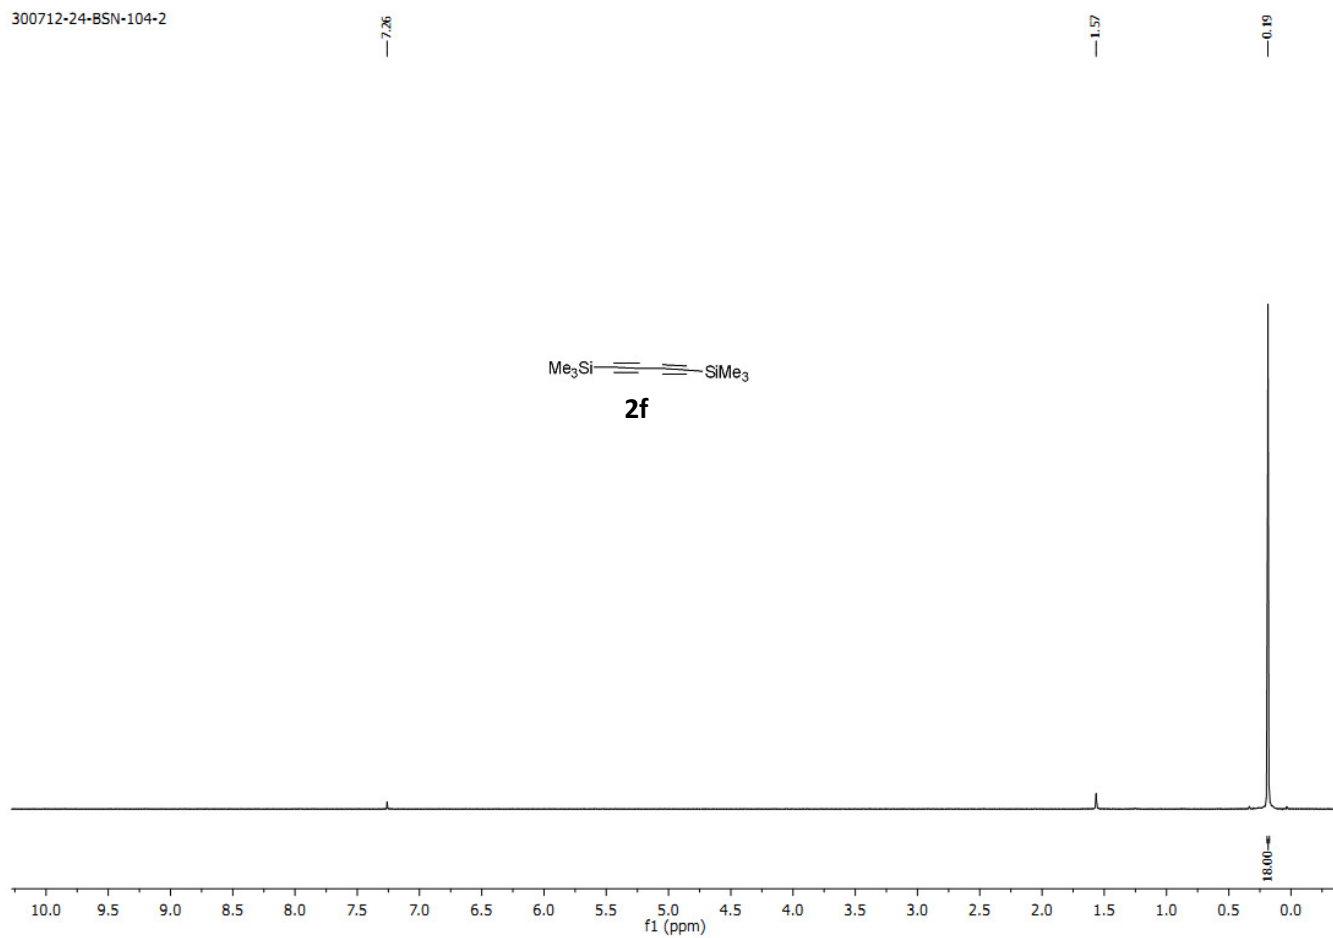

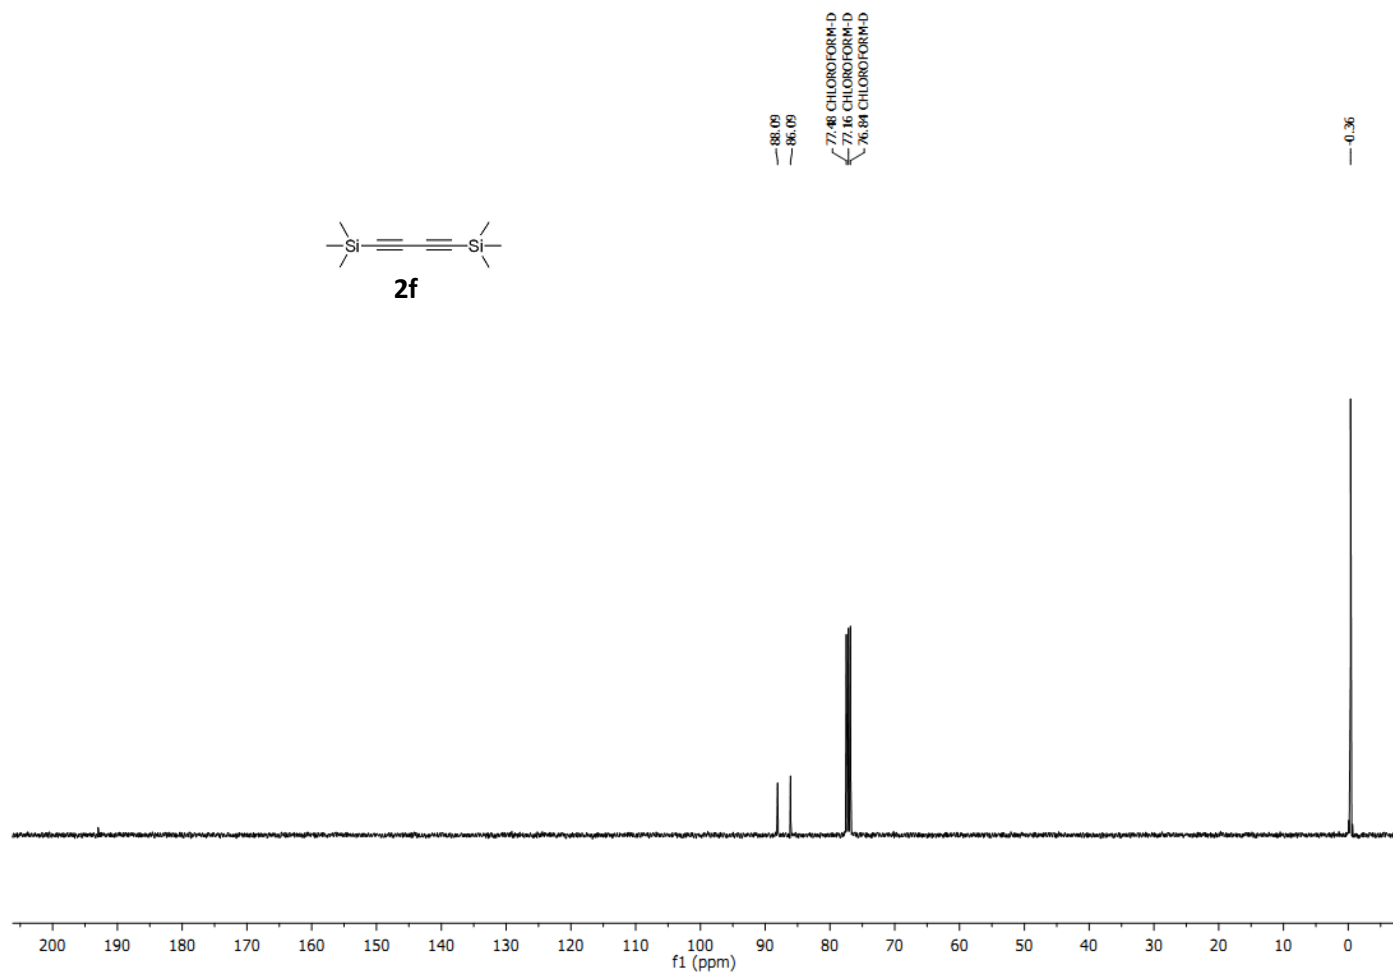

010812-02-BSN-110-04

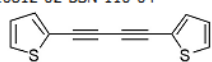

**2g**

7.36  
7.35  
7.35  
7.34  
7.34  
7.33  
7.32  
7.32  
7.26  
7.01  
7.01  
6.99

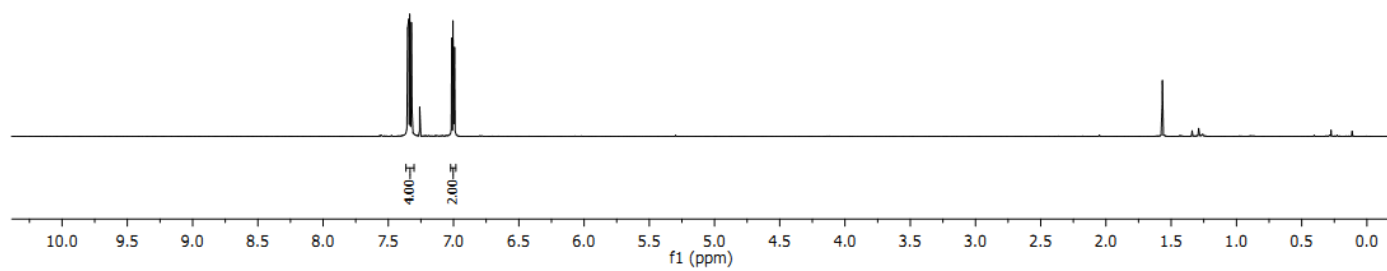

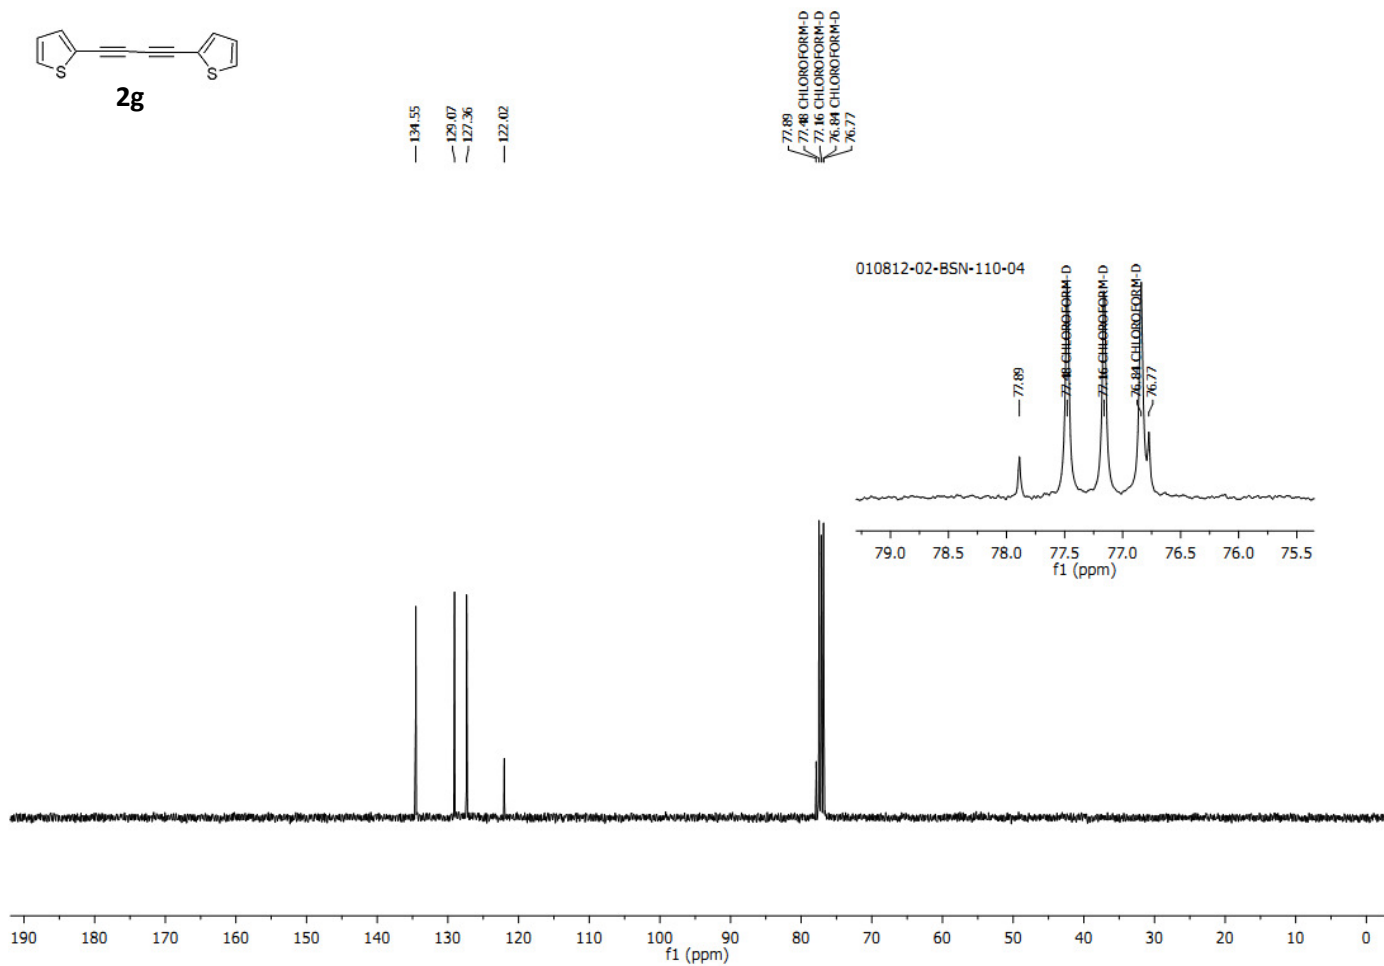

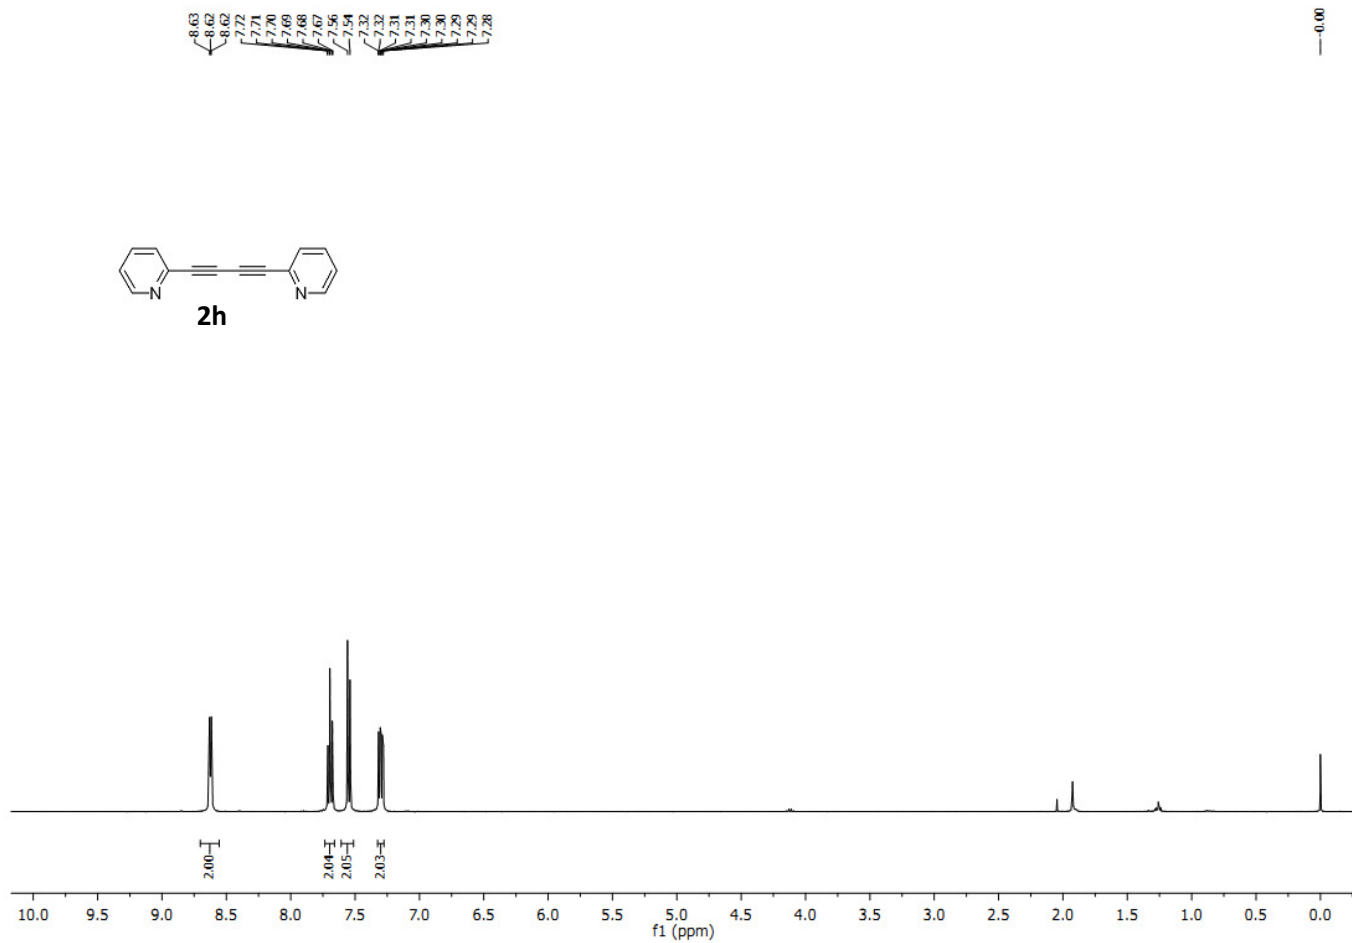



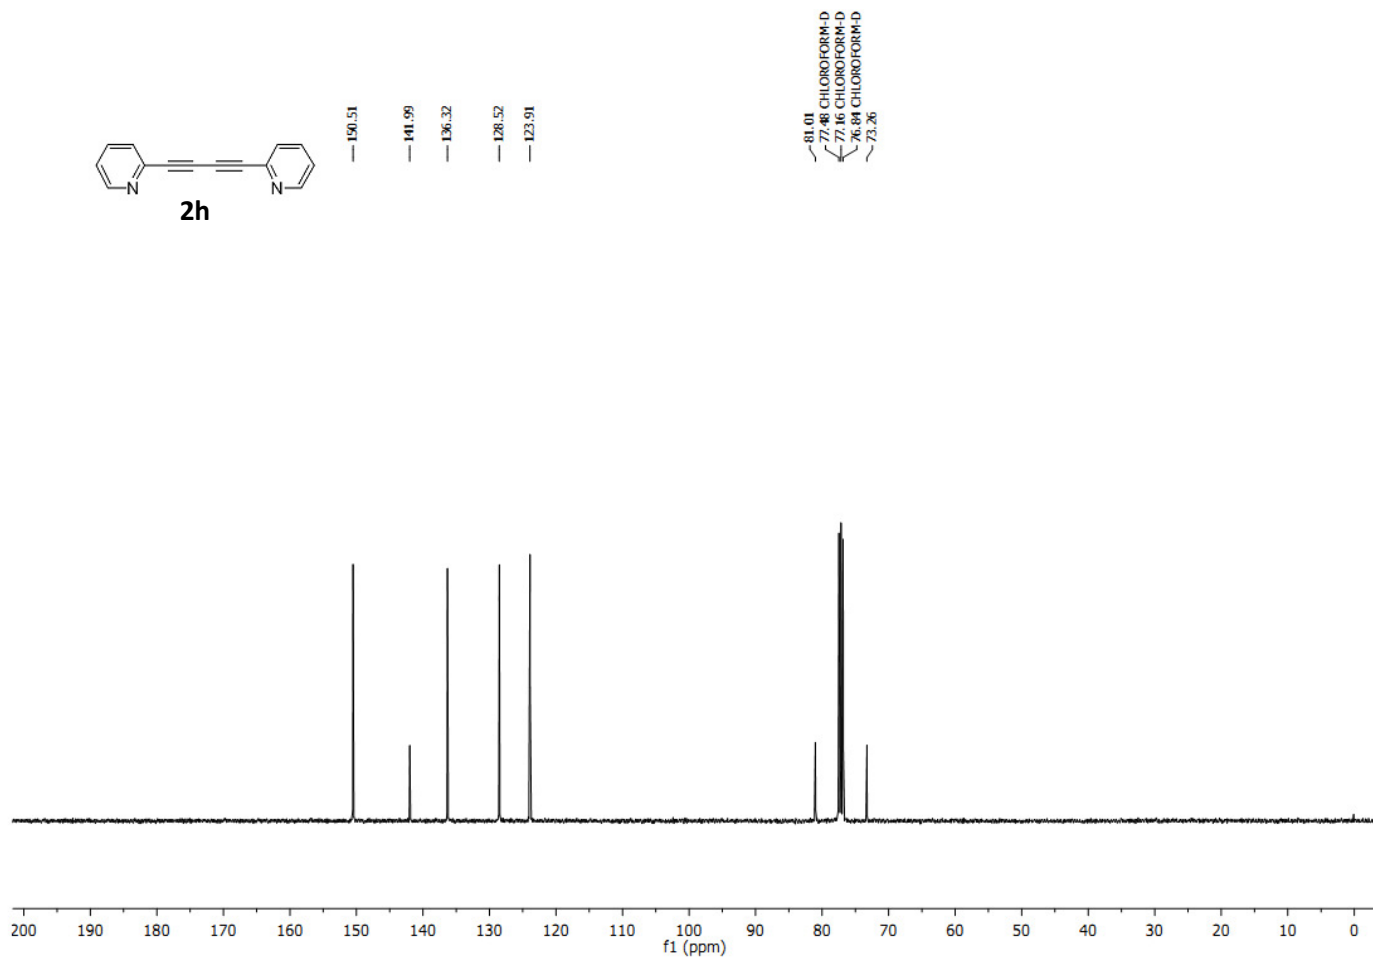

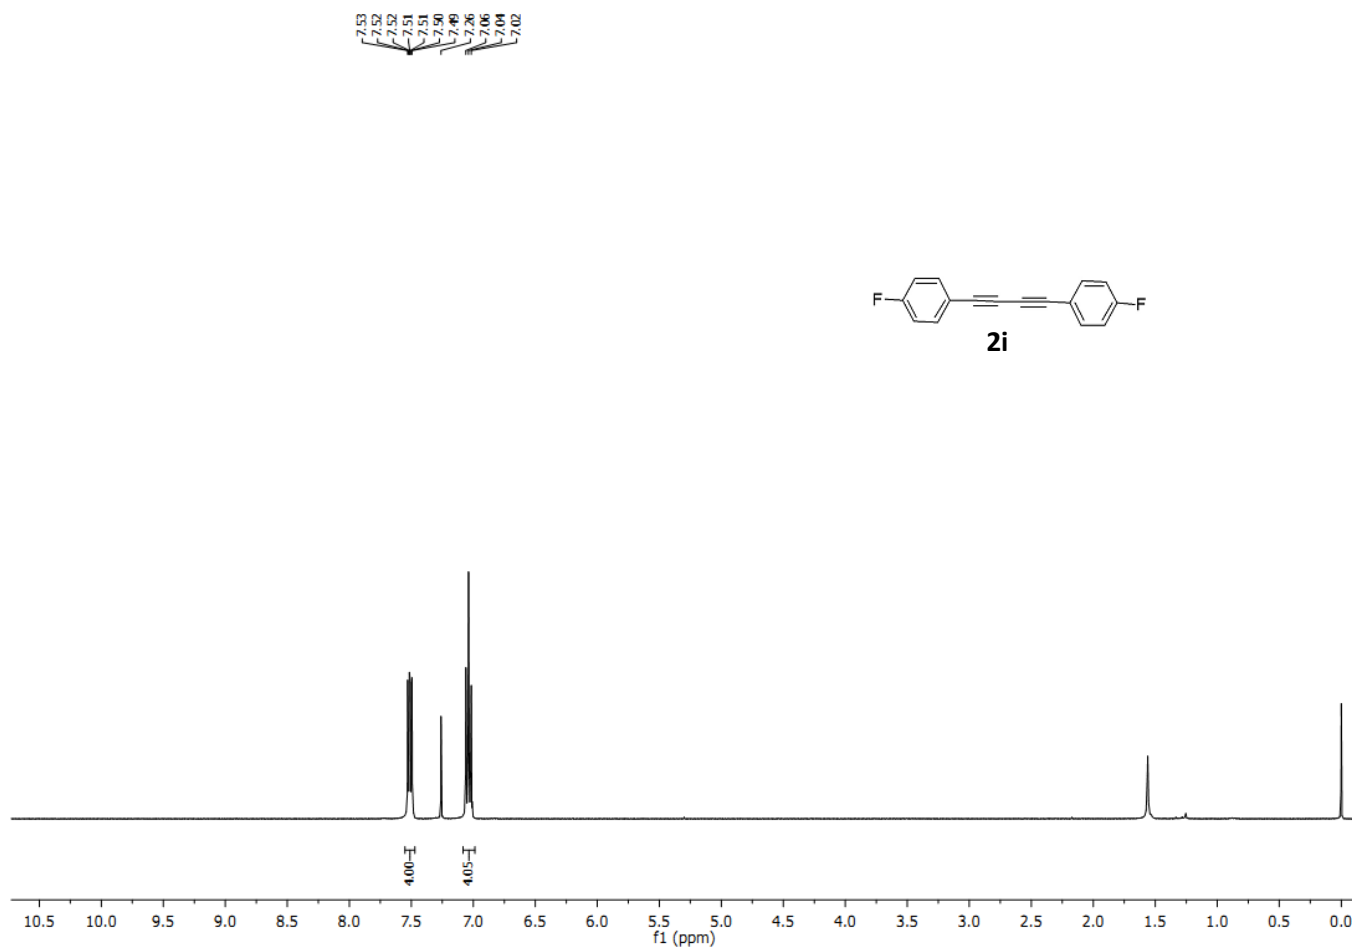

060812-16-BSN-111

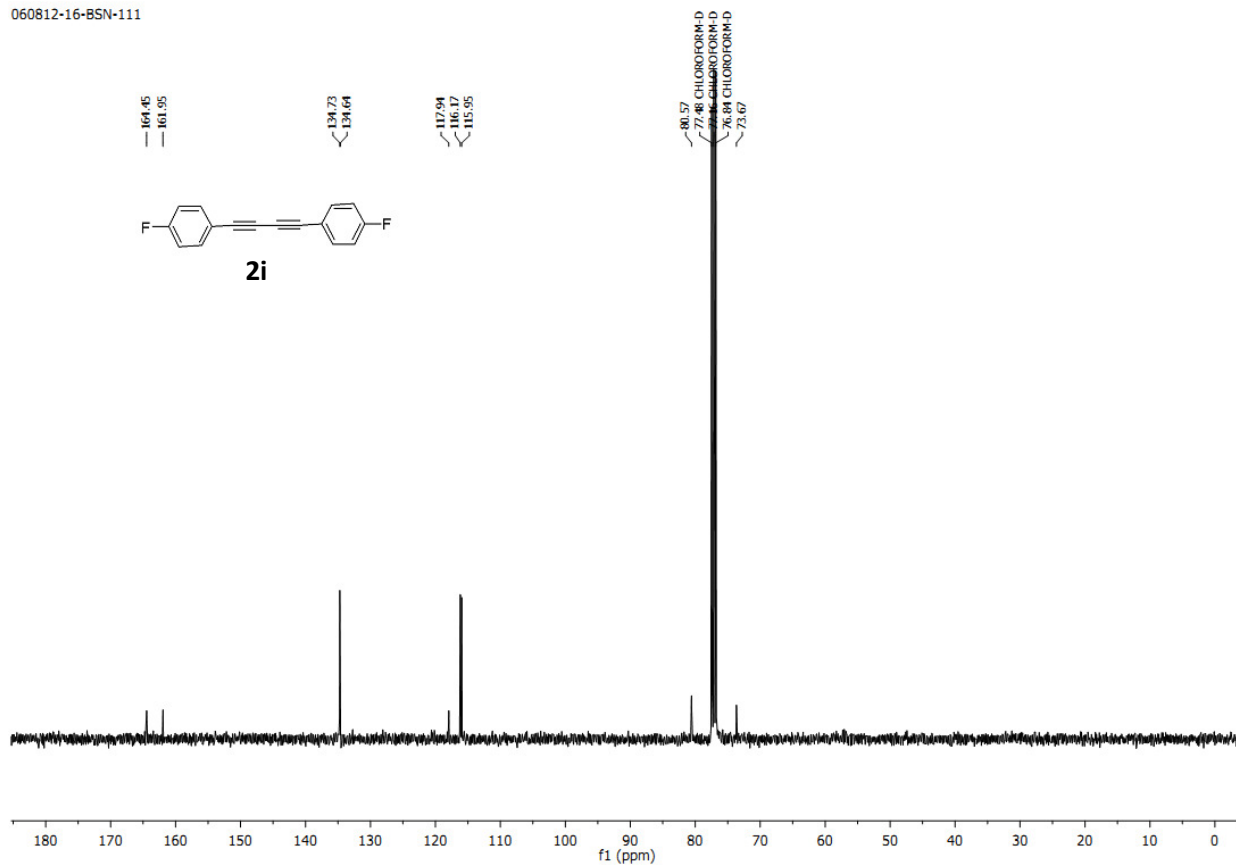

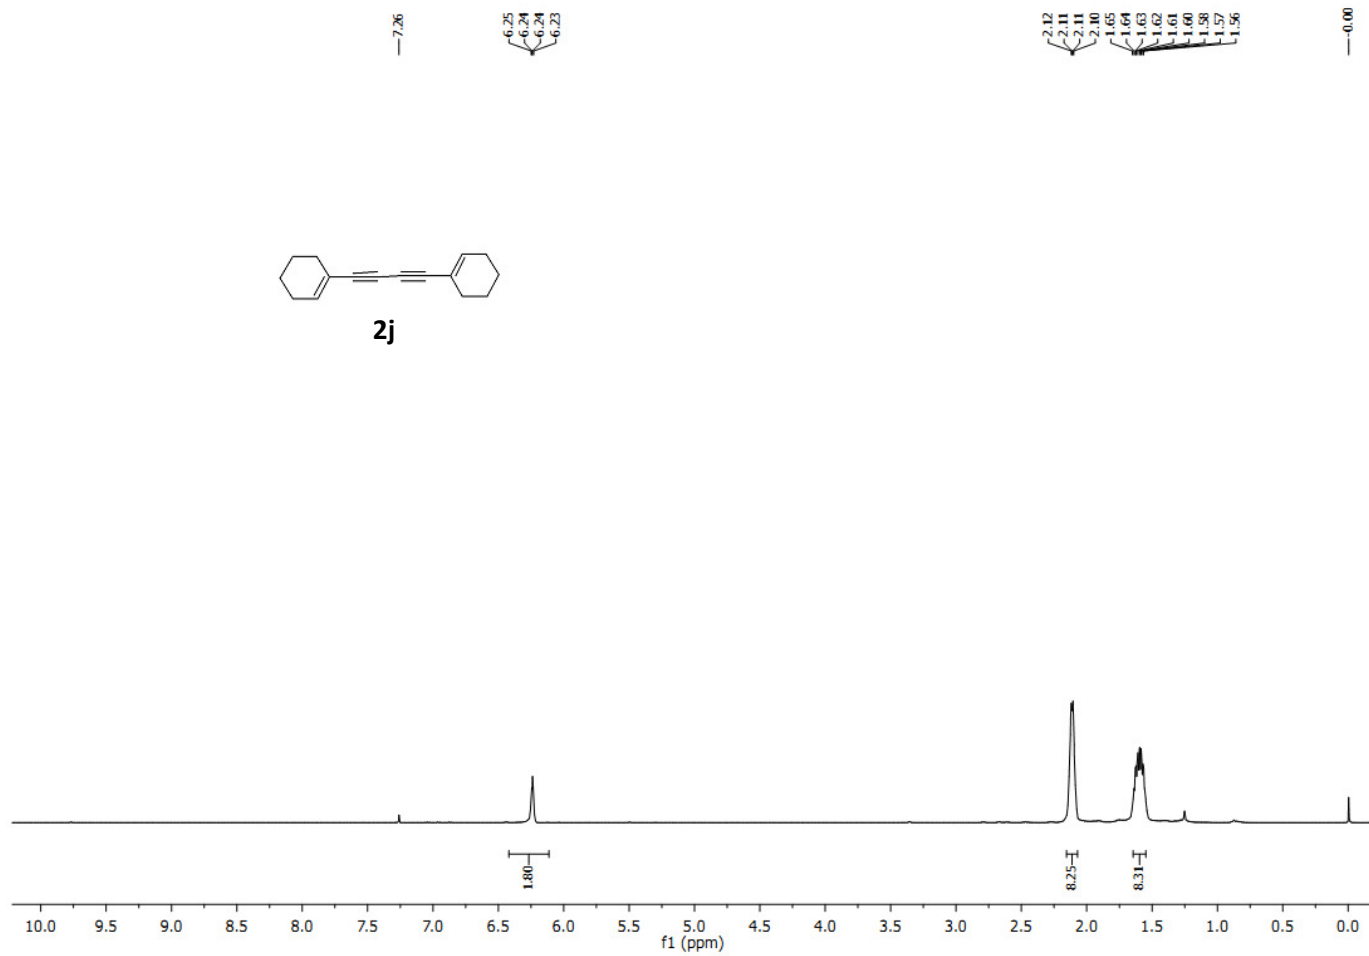

090812-11-BSN-115

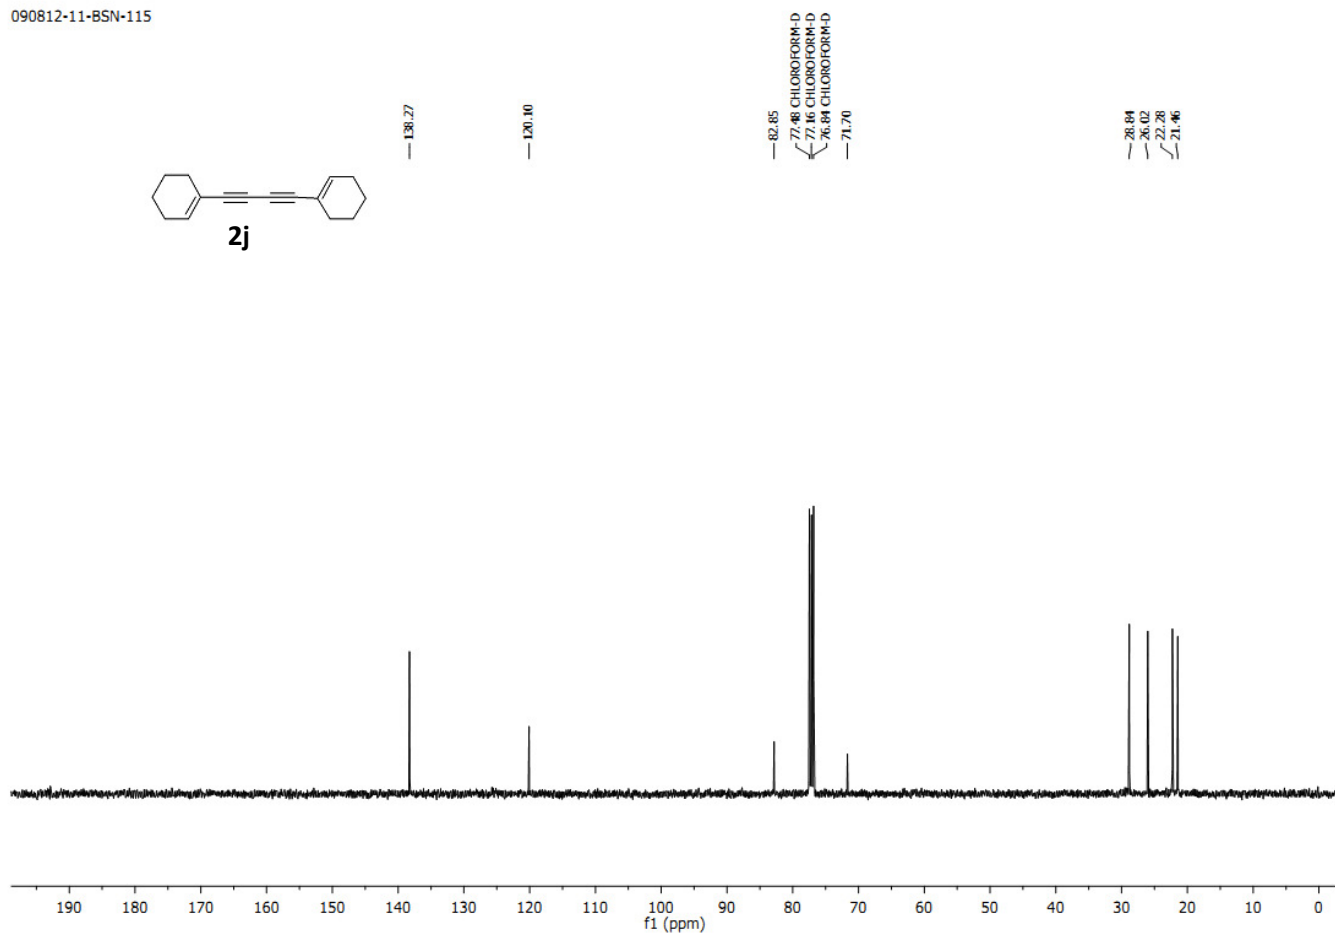

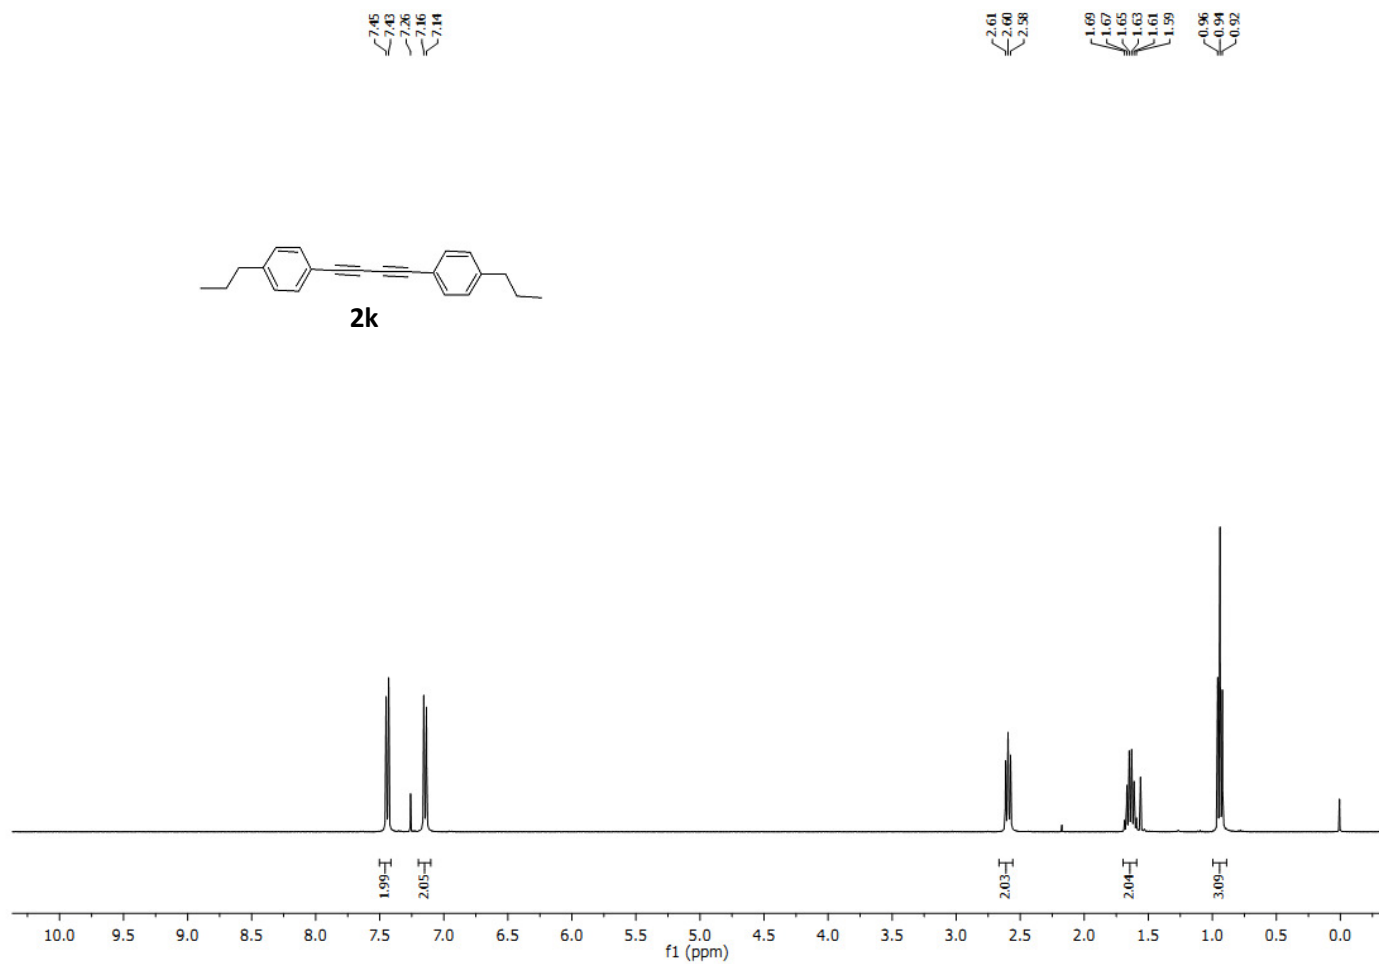

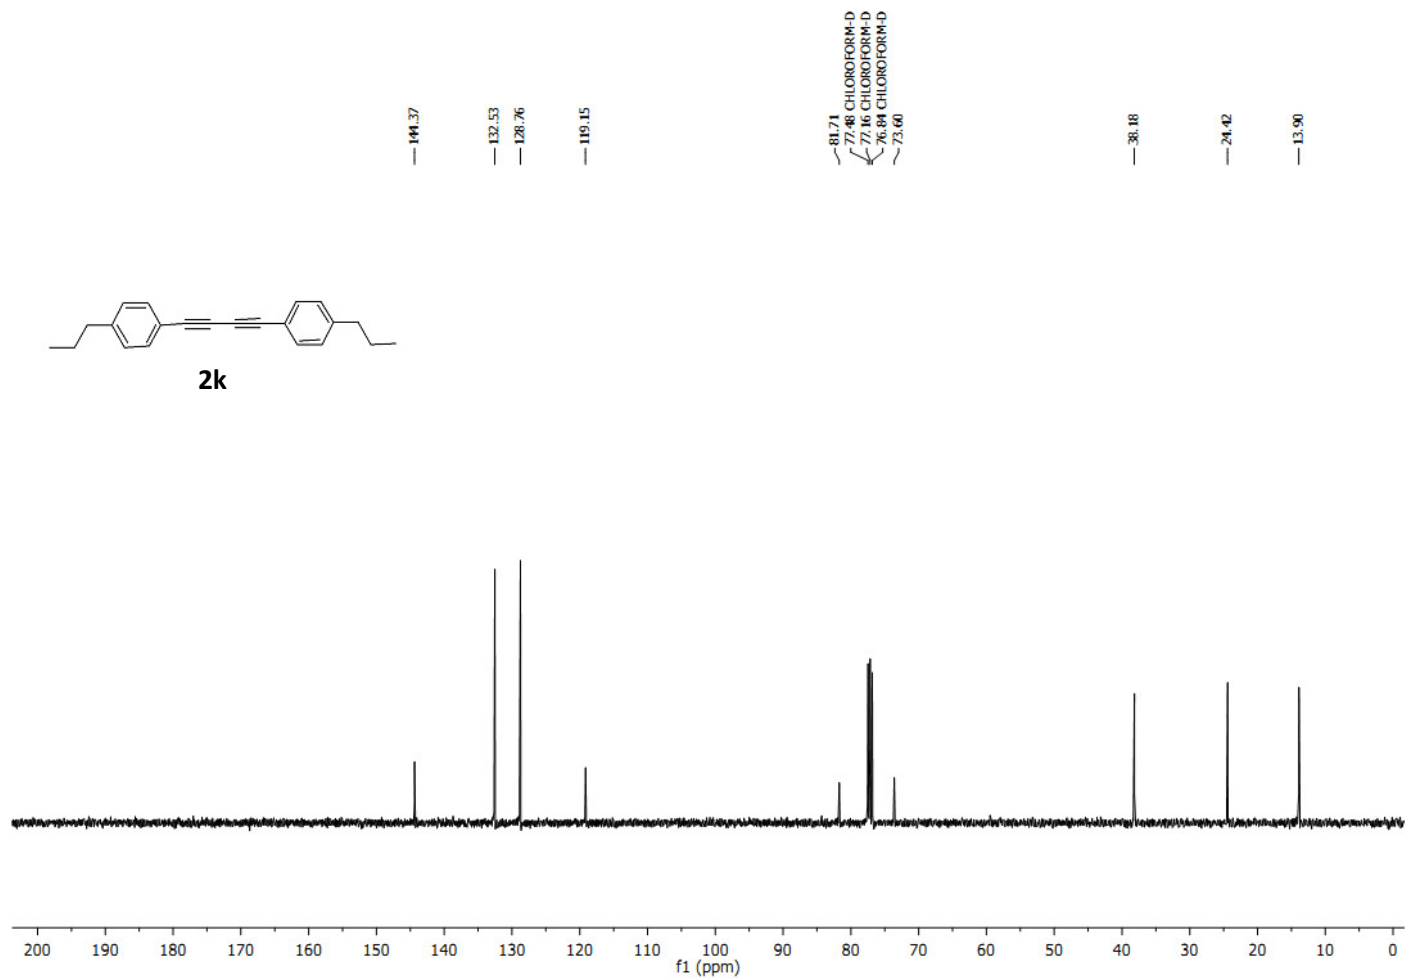

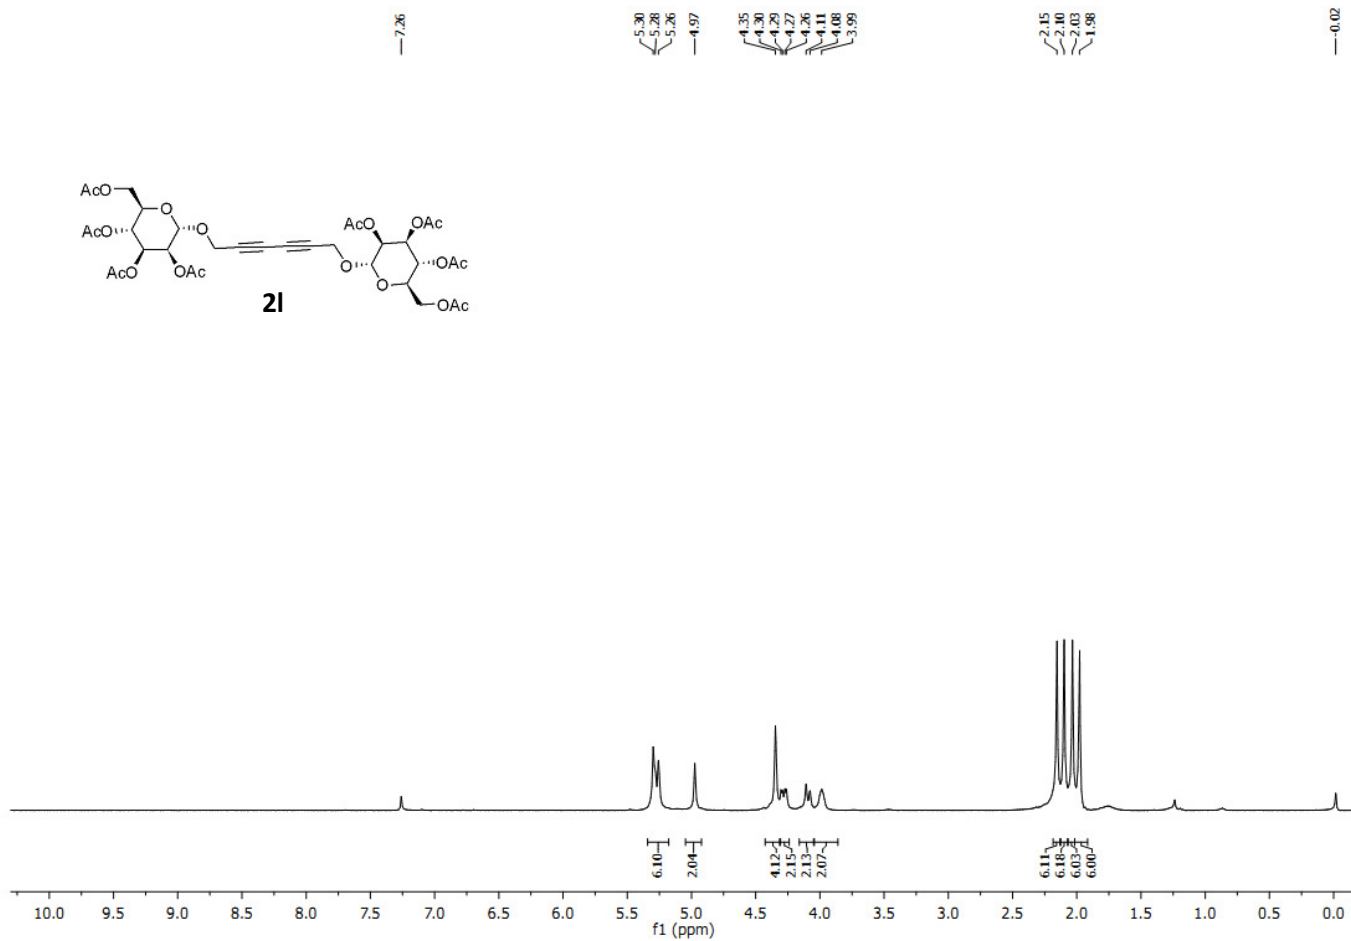



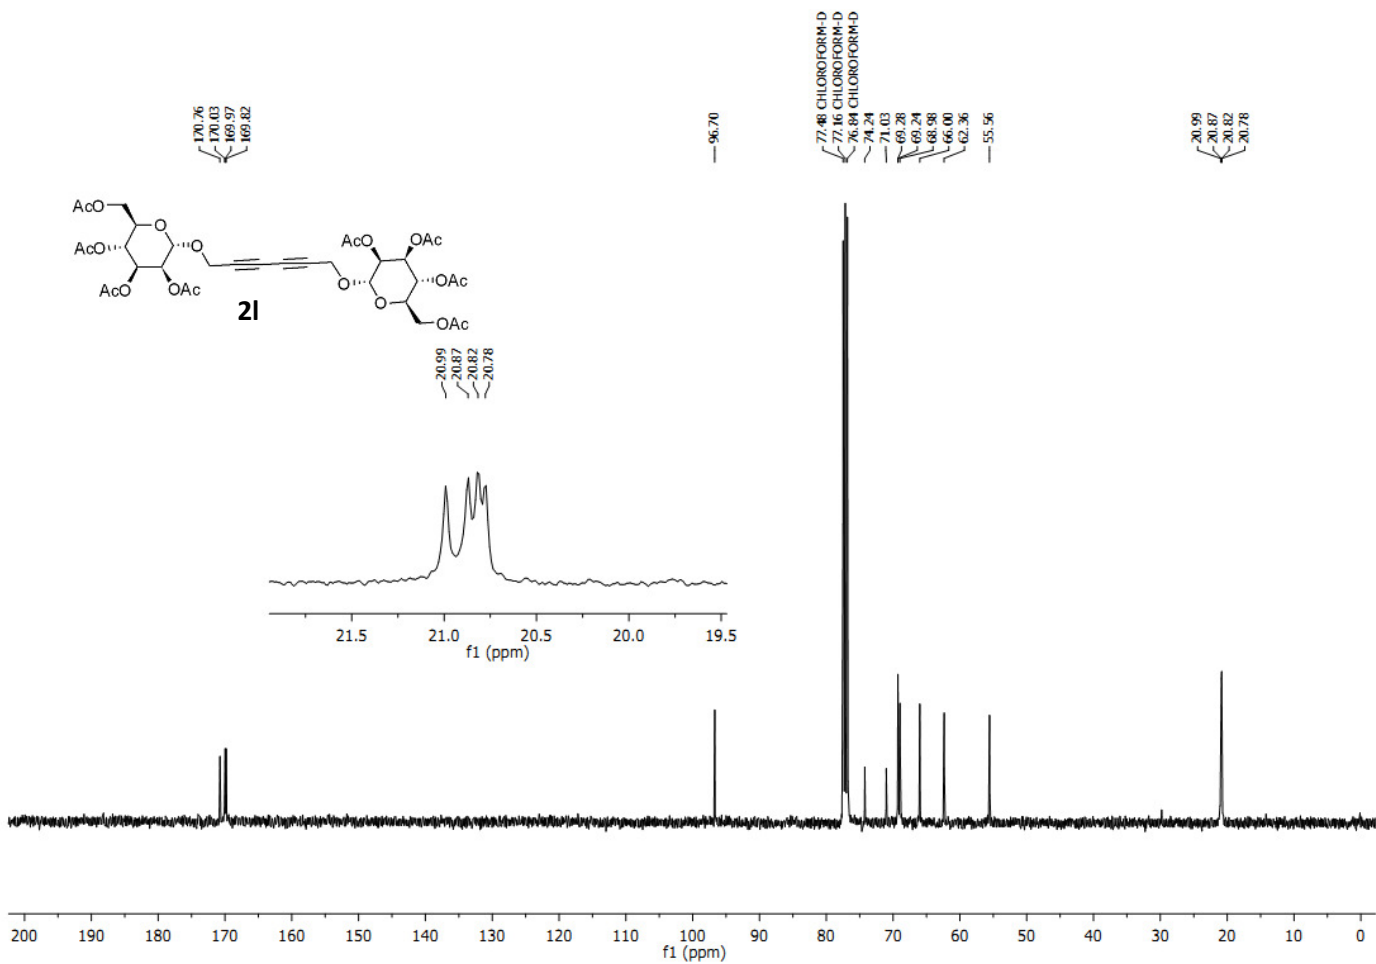

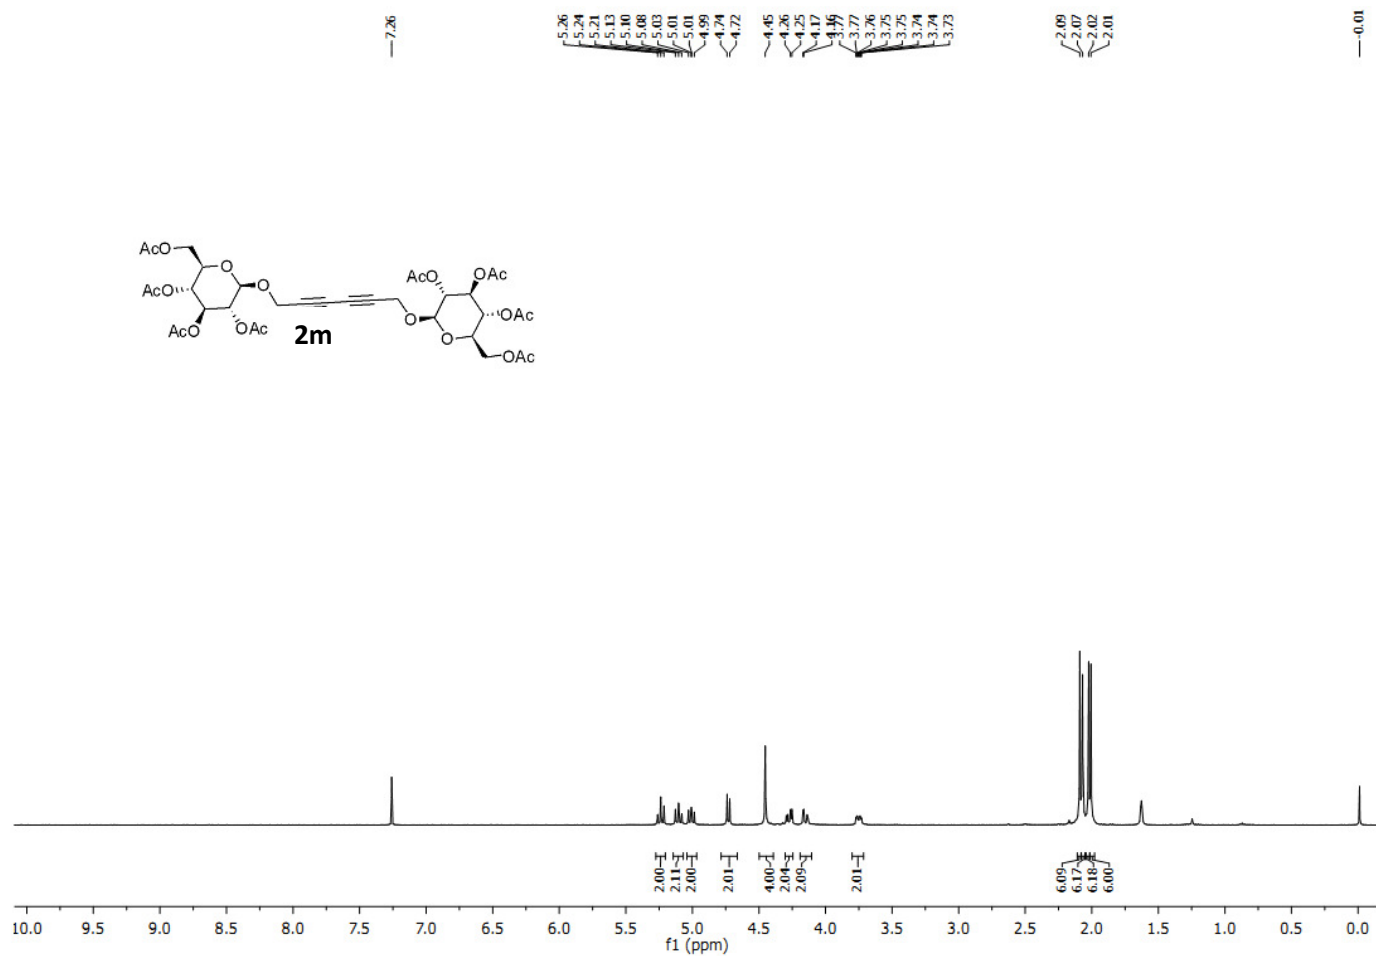

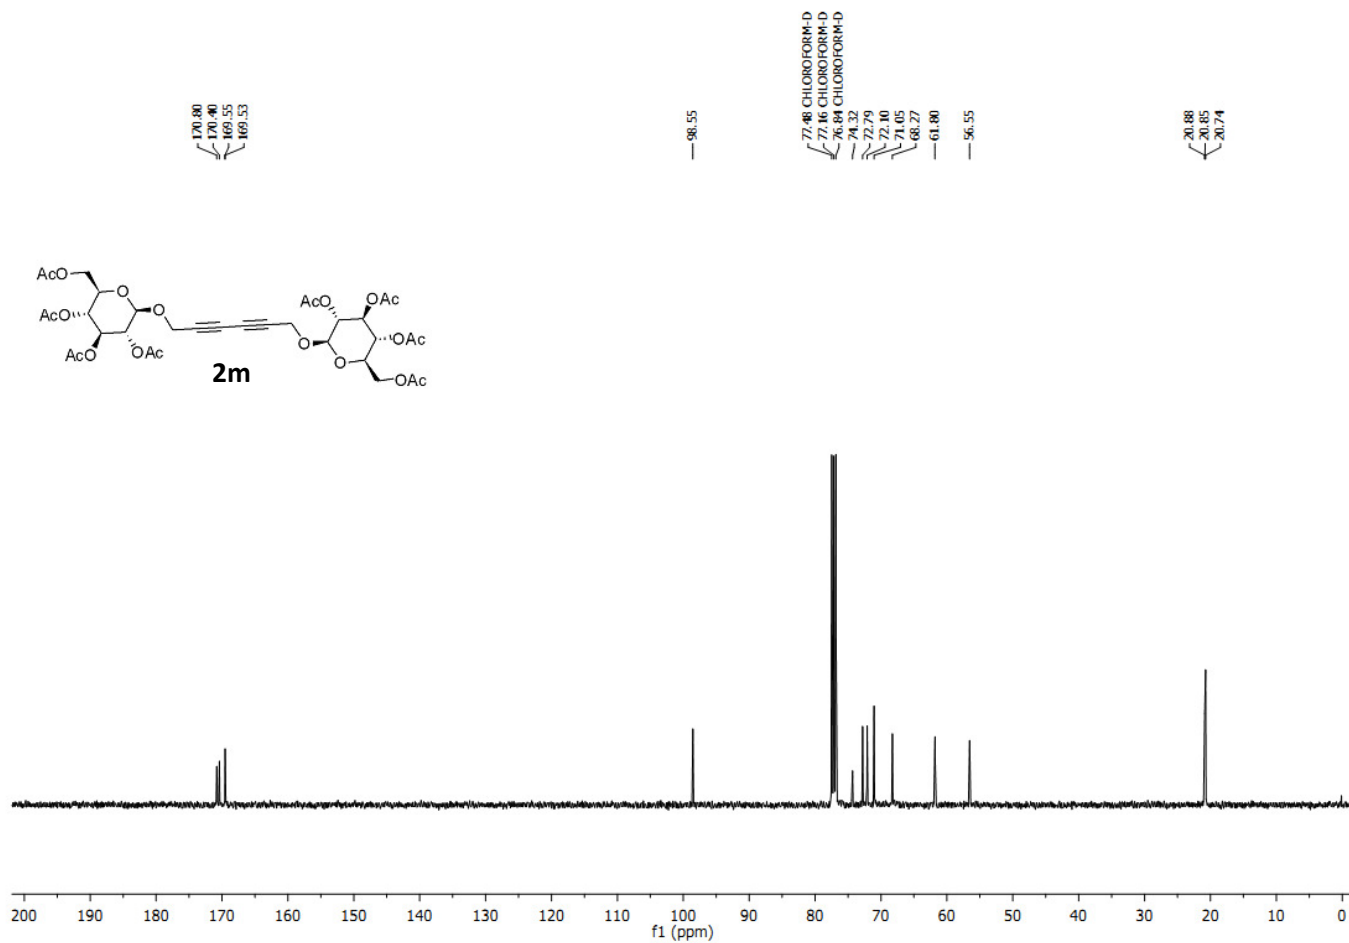

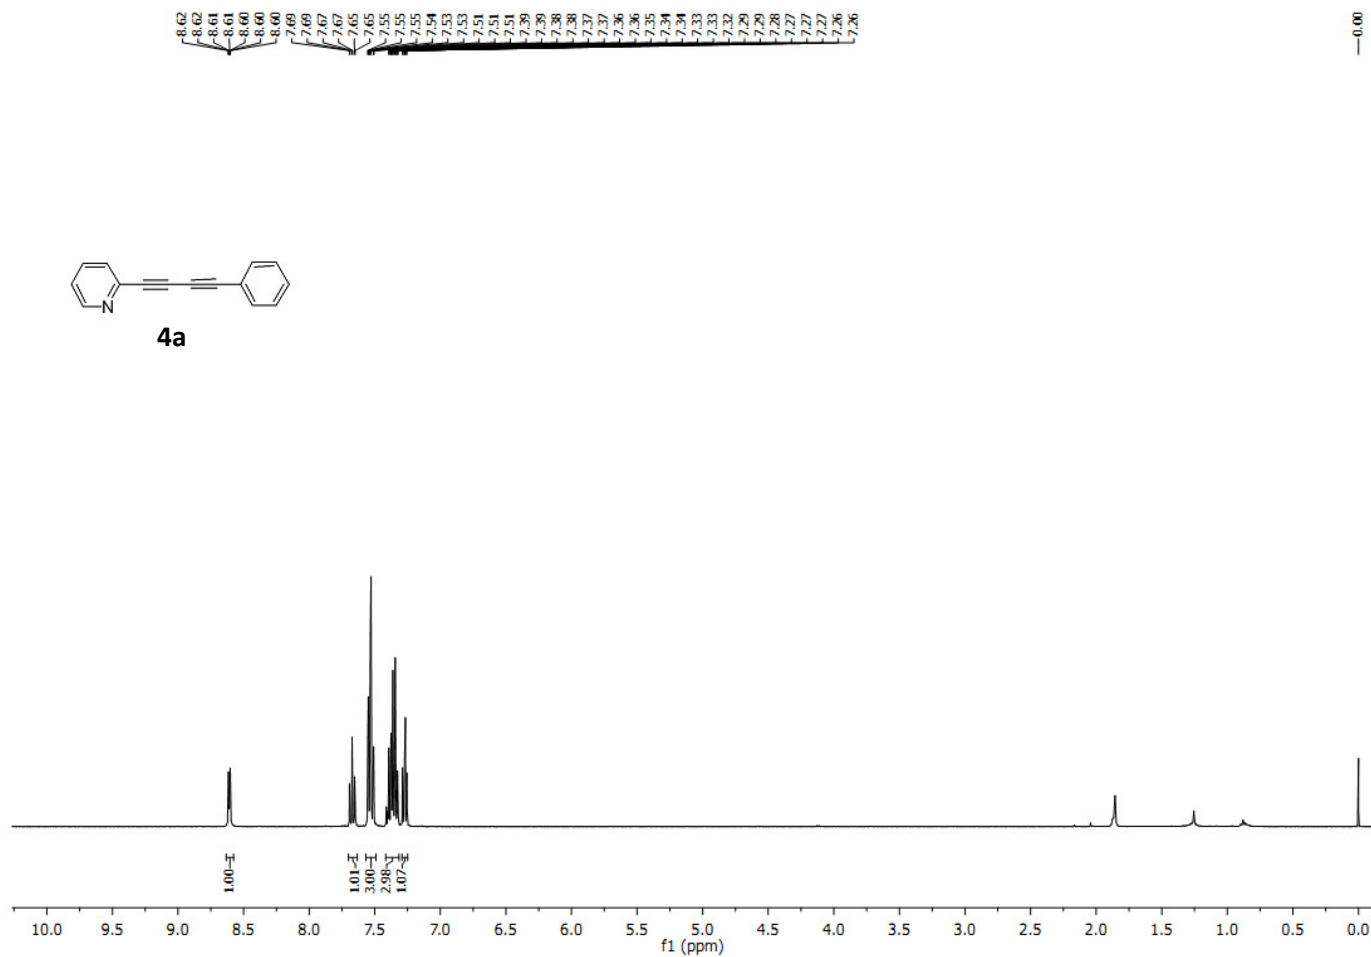

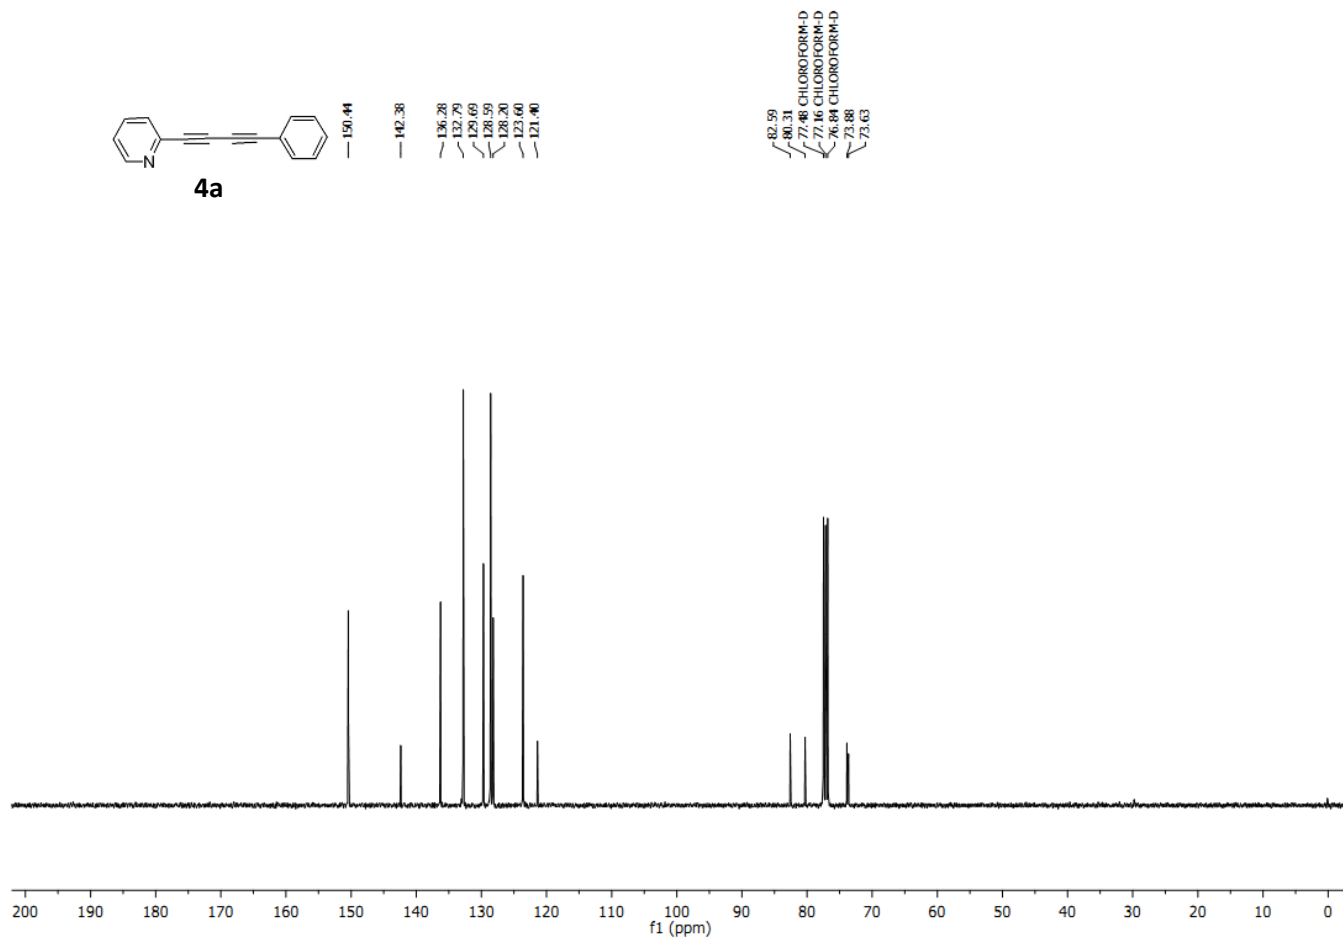

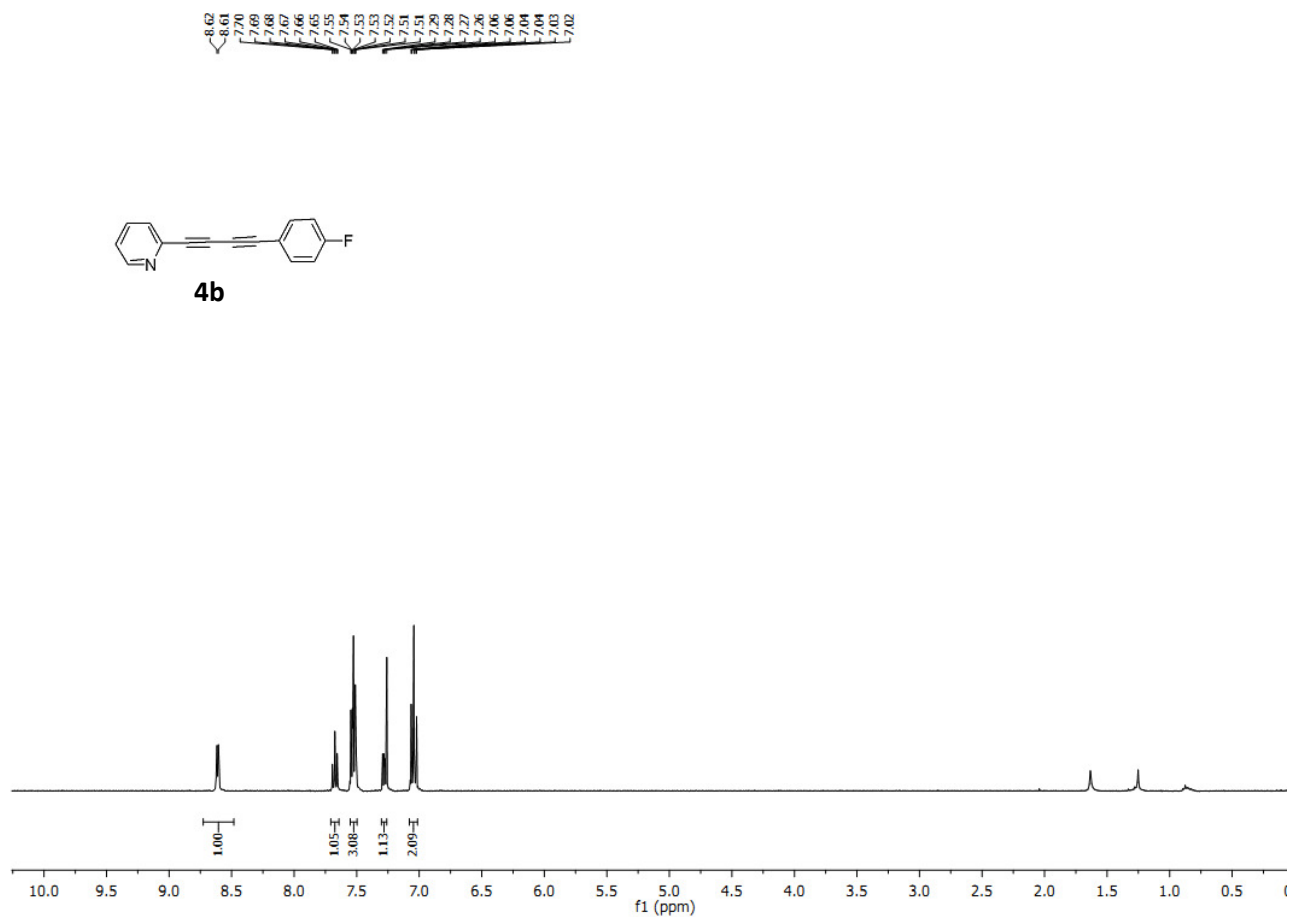

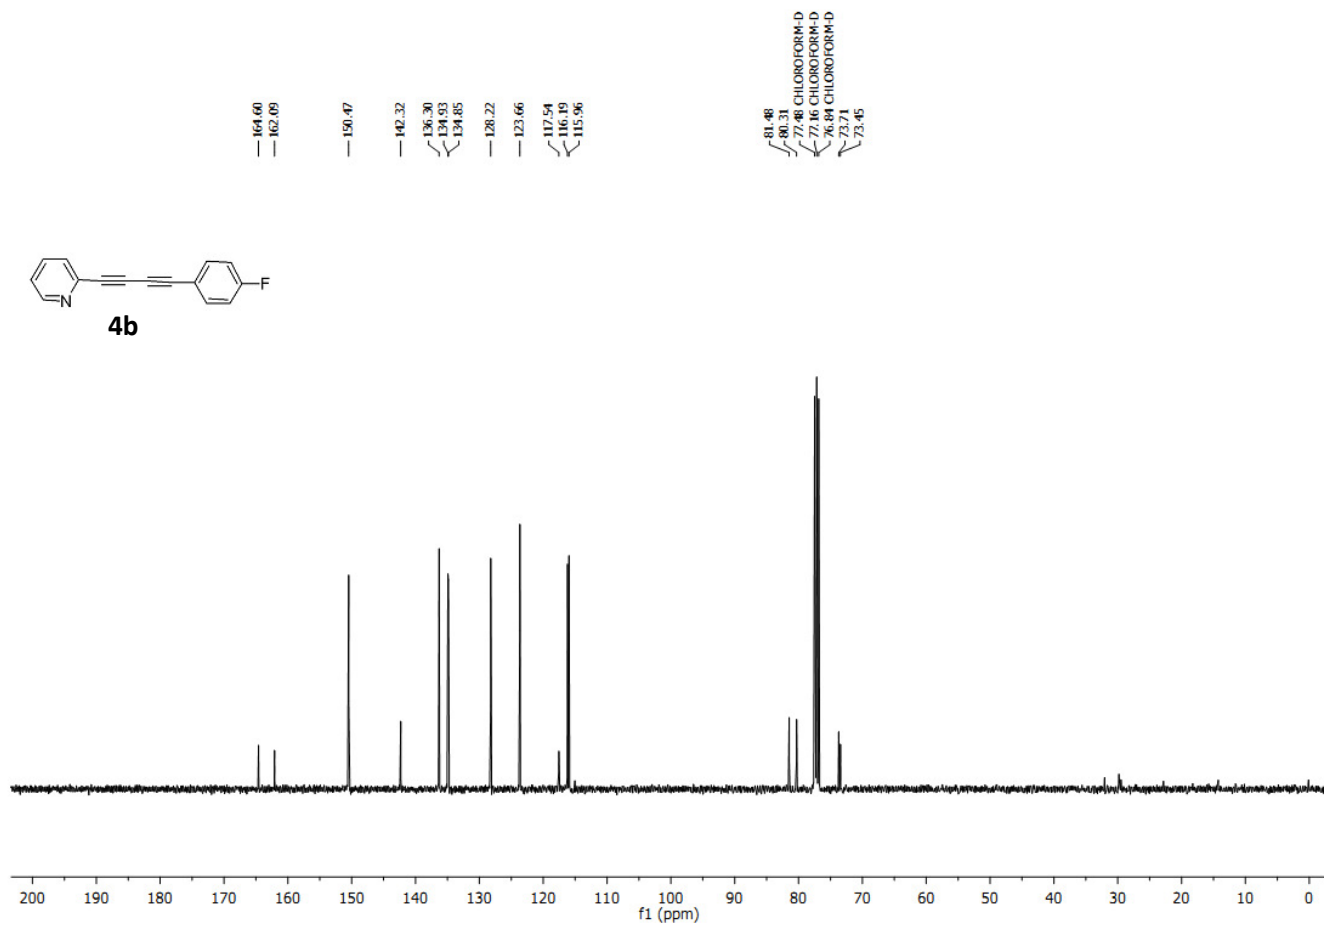

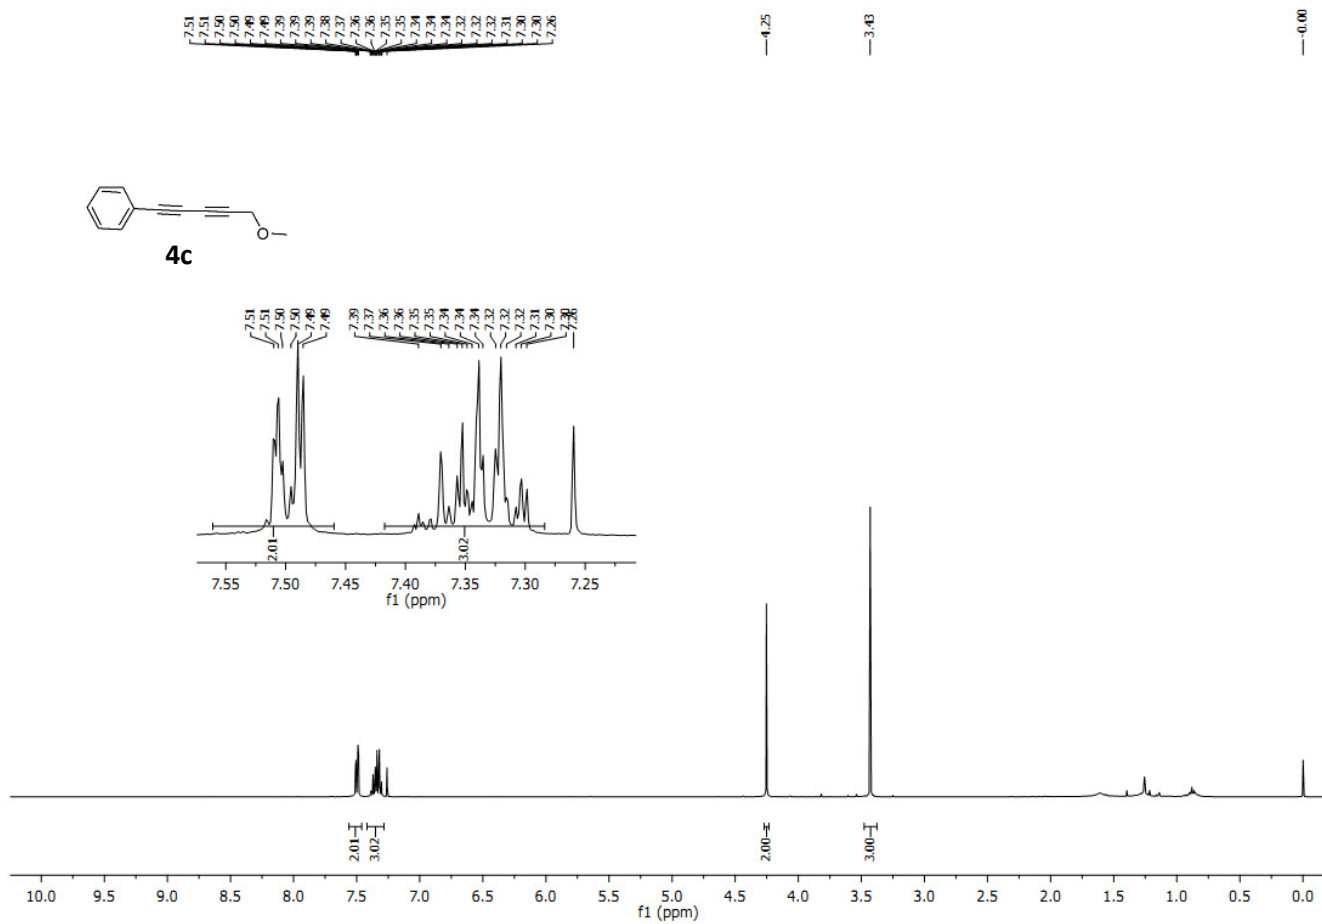



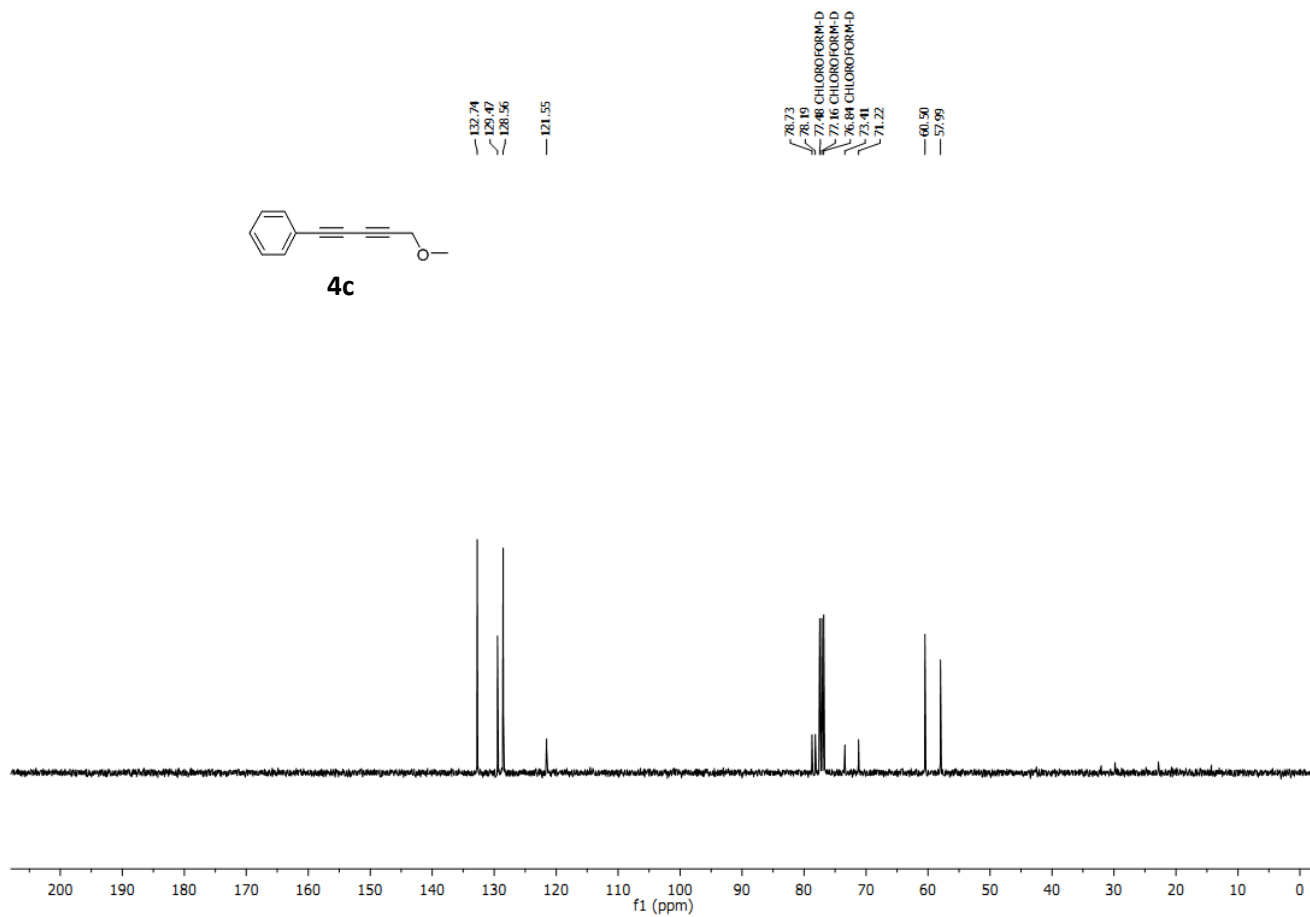

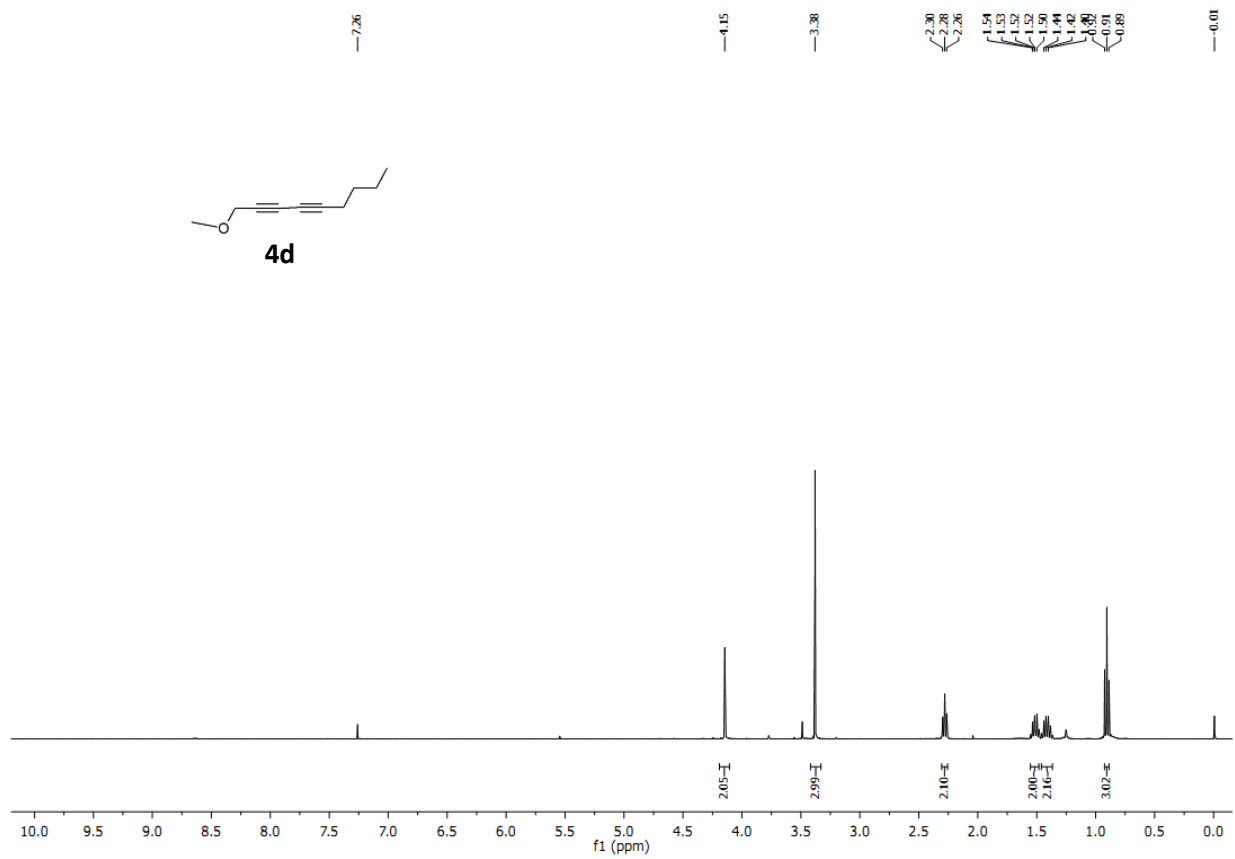

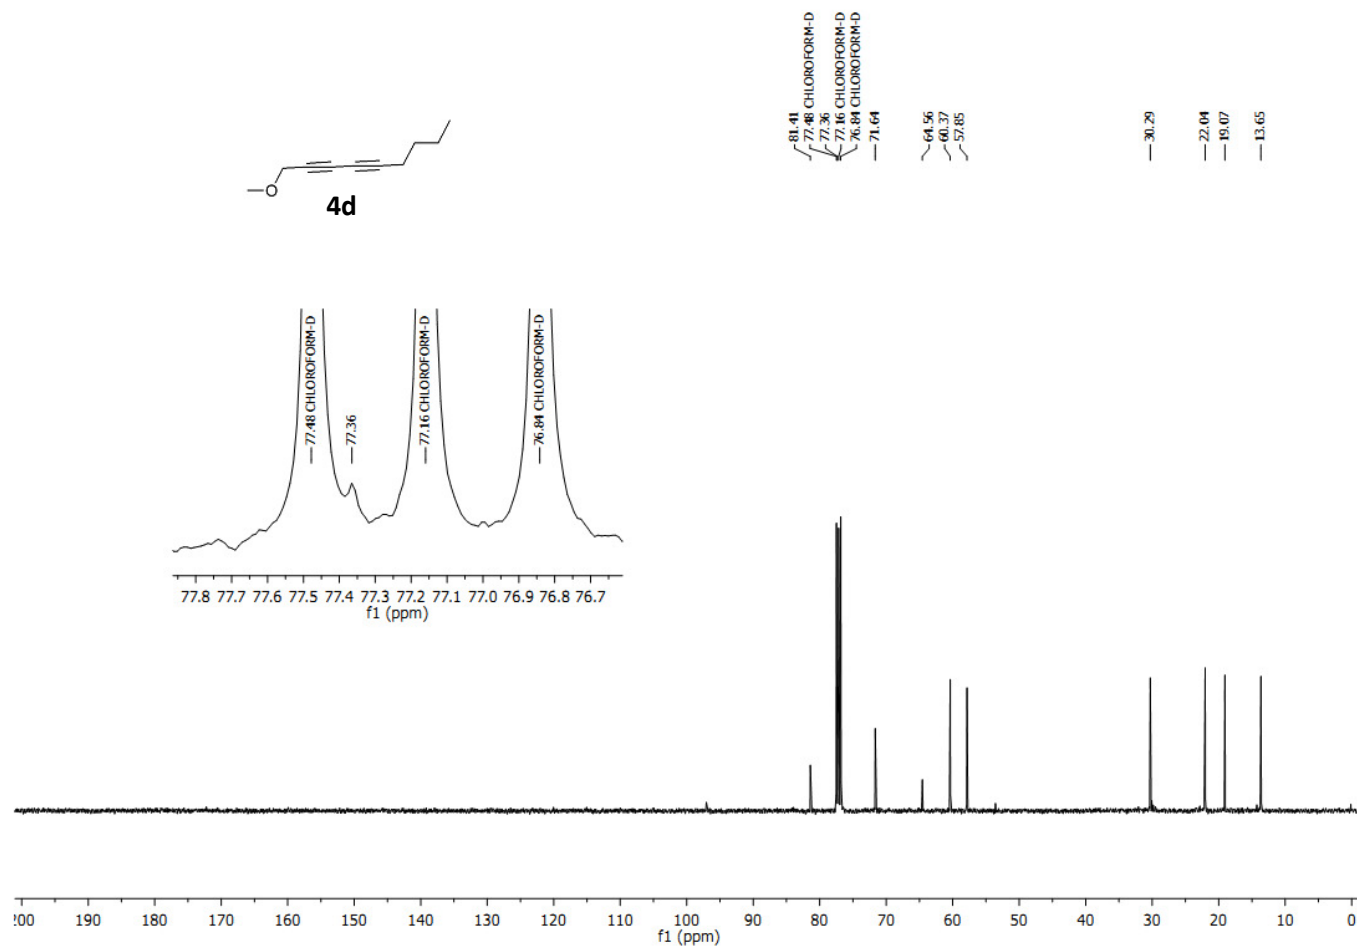

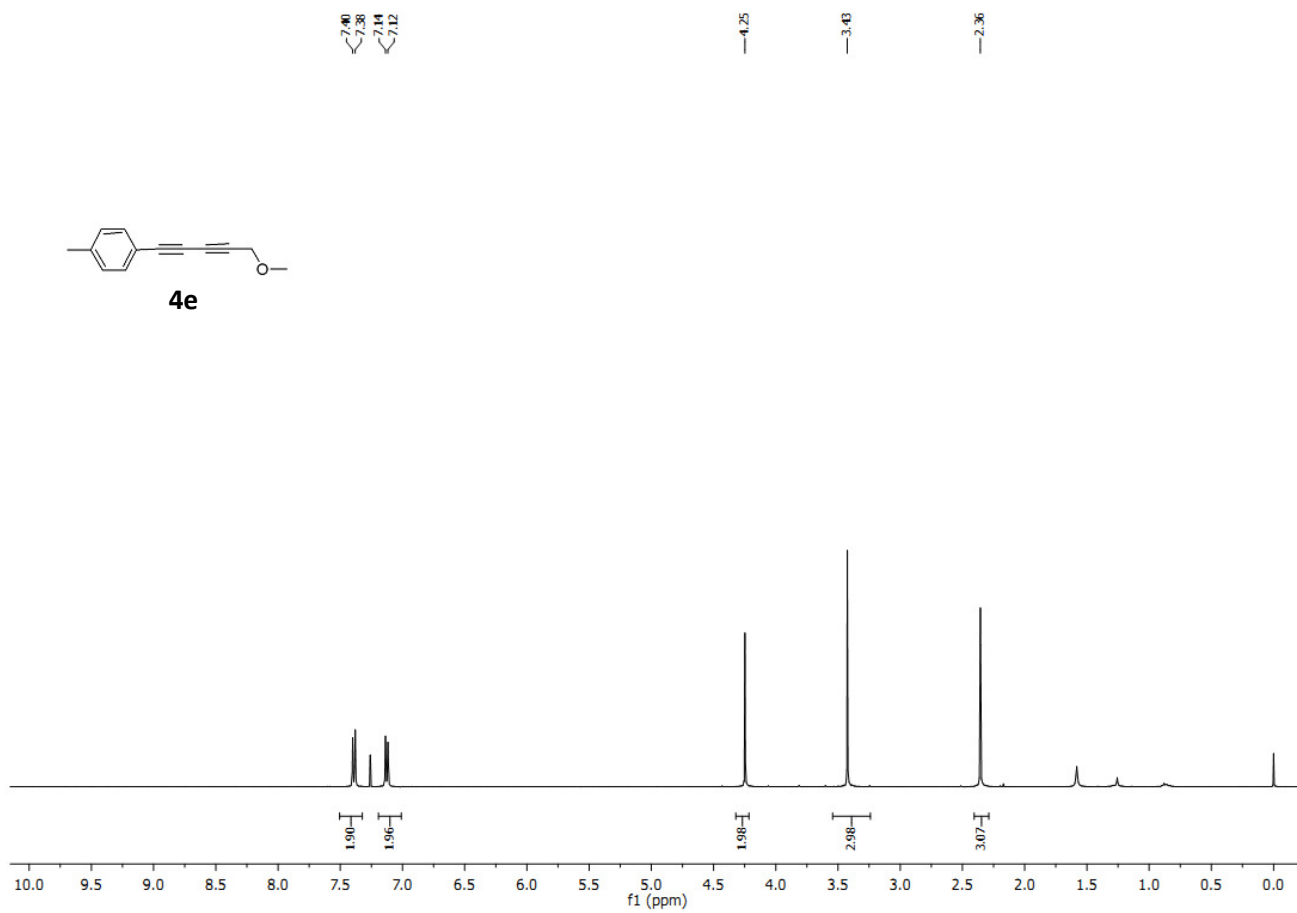

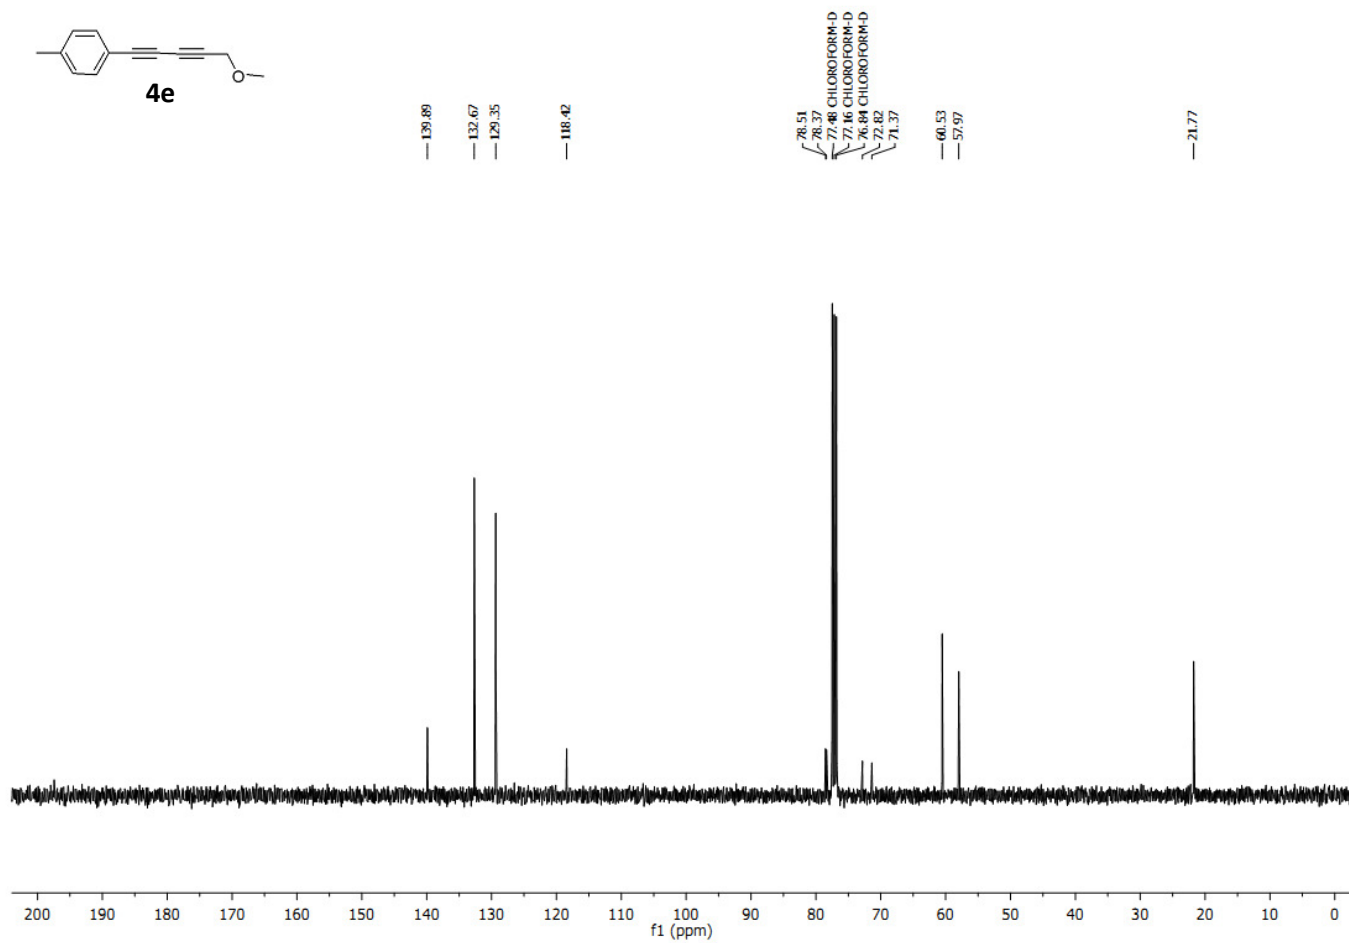

Supplement: c3ra23478a.pdf [file c3ra23478a.pdf]
